# Supplementary material for: Long non-coding RNA CYTOR promotes the progression of melanoma via the miR-485-5p/GPI axis
Source: PeerJ journal article supplement (doi:10.7717/peerj.19284), 2025-04-22
Supplement: MIQE_checklist.xls [file MIQE_checklist.xls]

## Sheet: Sheet1
ITEM TO CHECK	IMPORTANCE	CHECKLIST
EXPERIMENTAL DESIGN
Definition of experimental and control groups	E	Page 8, Line 137-139
Number within each group	E	Page 8, Line 137
Assay carried out by core lab or investigator's lab?	D	Page 8, Line 139-140
Acknowledgement of authors' contributions	D
SAMPLE
Description	E	Page 8, Line 137-141
Volume/mass of sample processed	D
Microdissection or macrodissection	E	N/A
Processing procedure	E	Page 8, Line 135-140
If frozen - how and how quickly?	E	N/A
If fixed - with what, how quickly?	E	N/A
Sample storage conditions and duration (especially for FFPE samples)	E	N/A
NUCLEIC ACID EXTRACTION
Procedure and/or instrumentation	E	Page 10, Line 159-165
Name of kit and details of any modifications	E
Source of additional reagents used	D
Details of DNase or RNAse treatment	E	Page 6, Line 77-79
Contamination assessment (DNA or RNA)	E	N/A
Nucleic acid quantification	E	Page 6, Line 80-82
Instrument and method	E	Page 6, Line 80-82
Purity (A260/A280)	D
Yield	D
RNA integrity method/instrument	E	N/A
RIN/RQI or Cq of 3' and 5' transcripts	E	N/A
Electrophoresis traces	D
Inhibition testing (Cq dilutions, spike or other)	E	N/A
REVERSE TRANSCRIPTION
Complete reaction conditions	E	Page 6, Line 80-82
Amount of RNA and reaction volume	E	N/A
Priming oligonucleotide (if using GSP) and concentration	E	N/A
Reverse transcriptase and concentration	E	Page 6, Line 77-79
Temperature and time	E	N/A
Manufacturer of reagents and catalogue numbers	D
Cqs with and without RT	D*
Storage conditions of cDNA	D
qPCR TARGET INFORMATION
If multiplex, efficiency and LOD of each assay.	E	N/A
Sequence accession number	E	N/A
Location of amplicon	D
Amplicon length	E	Page 6, Line 83-87
In silico specificity screen (BLAST, etc)	E	N/A
Pseudogenes, retropseudogenes or other homologs?	D
Sequence alignment	D
Secondary structure analysis of amplicon	D
Location of each primer by exon or intron (if applicable)	E	N/A
What splice variants are targeted?	E	N/A
qPCR OLIGONUCLEOTIDES
Primer sequences	E	Page 6, Line 83-87
RTPrimerDB Identification Number	D
Probe sequences	D**
Location and identity of any modifications	E	N/A
Manufacturer of oligonucleotides	D
Purification method	D
qPCR PROTOCOL
Complete reaction conditions	E	Page 6, Line 80-82
Reaction volume and amount of cDNA/DNA	E	N/A
Primer, (probe), Mg++ and dNTP concentrations	E	N/A
Polymerase identity and concentration	E	N/A
Buffer/kit identity and manufacturer	E	Page 6, Line 80-82
Exact chemical constitution of the buffer	D
Additives (SYBR Green I, DMSO, etc.)	E	Page 6, Line 80-82
Manufacturer of plates/tubes and catalog number	D
Complete thermocycling parameters	E	N/A
Reaction setup (manual/robotic)	D
Manufacturer of qPCR instrument	E	N/A
qPCR VALIDATION
Evidence of optimisation (from gradients)	D
Specificity (gel, sequence, melt, or digest)	E	Supporting Information
For SYBR Green I, Cq of the NTC	E	Supporting Information
Standard curves with slope and y-intercept	E	Supporting Information
PCR efficiency calculated from slope	E	Supporting Information
Confidence interval for PCR efficiency or standard error	D
r2 of standard curve	E	Supporting Information
Linear dynamic range	E	N/A
Cq variation at lower limit	E	N/A
Confidence intervals throughout range	D
Evidence for limit of detection	E	N/A
If multiplex, efficiency and LOD of each assay.	E	N/A
DATA ANALYSIS
qPCR analysis program (source, version)	E	Supporting Information
Cq method determination	E	Supporting Information
Outlier identification and disposition	E	N/A
Results of NTCs	E	Supporting Information
Justification of number and choice of reference genes	E	Page 6, Line 83-87
Description of normalisation method	E	Page 6, Line 83-87
Number and concordance of biological replicates	D
Number and stage (RT or qPCR) of technical replicates	E	N/A
Repeatability (intra-assay variation)	E	Supporting Information
Reproducibility (inter-assay variation, %CV)	D
Power analysis	D
Statistical methods for result significance	E	Page 10, Line 159-165
Software (source, version)	E	Page 10, Line 159-165
Cq or raw data submission using RDML	D
Table 1. MIQE checklist for authors, reviewers and editors. All essential information (E) must be submitted with the manuscript. Desirable
information (D) should be submitted if available. If using primers obtained from RTPrimerDB, information on qPCR target, oligonucleotides,
protocols and validation is available from that source.
*: Assessing the absence of DNA using a no RT assay is essential when first extracting RNA. Once the sample has been validated as
RDNA-free, inclusion of a no-RT control is desirable, but no longer essential.
**: Disclosure of the probe sequence is highly desirable and strongly encouraged. However, since not all commercial pre-designed assay
vendors provide this information, it cannot be an essential requirement. Use of such assays is advised against.
