# Supplementary material for: Long non-coding RNA CYTOR promotes the progression of melanoma via the miR-485-5p/GPI axis
Source: PeerJ journal article supplement (doi:10.7717/peerj.19284), 2025-04-22
Supplement: Original_Data.zip [file Fig. 1.B-Original data-CYTOR expression levels were measured in melanoma tissue samples using qRT-PCR.xlsx]

## Sheet: Sheet1
Group		CT-value
Normal-1	GAPDH	13.52
	GAPDH	13.63
	GAPDH	13.59
	CYTOR	28.97
	CYTOR	29.02
	CYTOR	28.91
Cancer-1	GAPDH	13.59
	GAPDH	13.51
	GAPDH	13.3
	CYTOR	27.75
	CYTOR	27.9
	CYTOR	27.8
Normal-2	GAPDH	13.65
	GAPDH	13.73
	GAPDH	13.81
	CYTOR	29.02
	CYTOR	28.7
	CYTOR	28.81
Cancer-2	GAPDH	13.57
	GAPDH	13.62
	GAPDH	13.64
	CYTOR	28.09
	CYTOR	28.19
	CYTOR	27.9
Normal-3	GAPDH	13.86
	GAPDH	13.67
	GAPDH	13.67
	CYTOR	29.06
	CYTOR	28.99
	CYTOR	29.64
Cancer-3	GAPDH	13.55
	GAPDH	13.6
	GAPDH	13.57
	CYTOR	28
	CYTOR	27.83
	CYTOR	27.96
Normal-4	GAPDH	13.78
	GAPDH	13.83
	GAPDH	13.64
	CYTOR	28.73
	CYTOR	29
	CYTOR	29.15
Cancer-4	GAPDH	13.67
	GAPDH	13.61
	GAPDH	13.6
	CYTOR	27.7
	CYTOR	27.79
	CYTOR	27.7
Normal-5	GAPDH	13.65
	GAPDH	13.86
	GAPDH	13.78
	CYTOR	29.02
	CYTOR	29.06
	CYTOR	28.73
Cancer-5	GAPDH	13.57
	GAPDH	13.55
	GAPDH	13.67
	CYTOR	28.09
	CYTOR	28
	CYTOR	27.7
Normal-6	GAPDH	13.65
	GAPDH	13.67
	GAPDH	13.83
	CYTOR	28.7
	CYTOR	28.99
	CYTOR	29
Cancer-6	GAPDH	13.62
	GAPDH	13.6
	GAPDH	13.61
	CYTOR	28.19
	CYTOR	27.83
	CYTOR	27.79
Normal-7	GAPDH	13.73
	GAPDH	13.67
	GAPDH	13.64
	CYTOR	28.81
	CYTOR	28.99
	CYTOR	29.15
Cancer-7	GAPDH	13.64
	GAPDH	13.57
	GAPDH	13.6
	CYTOR	27.9
	CYTOR	27.96
	CYTOR	27.7
Normal-8	GAPDH	13.81
	GAPDH	13.94
	GAPDH	13.62
	CYTOR	28.97
	CYTOR	28.99
	CYTOR	29.15
Cancer-8	GAPDH	13.84
	GAPDH	13.6
	GAPDH	13.62
	CYTOR	27.69
	CYTOR	27.76
	CYTOR	27.9
Normal-9	GAPDH	13.66
	GAPDH	13.49
	GAPDH	13.39
	CYTOR	29.55
	CYTOR	29.7
	CYTOR	29.77
Cancer-9	GAPDH	13.68
	GAPDH	13.62
	GAPDH	13.53
	CYTOR	28.08
	CYTOR	27.79
	CYTOR	27.94
Normal-10	GAPDH	13.68
	GAPDH	13.75
	GAPDH	13.77
	CYTOR	29.25
	CYTOR	29.17
	CYTOR	29.29
Cancer-10	GAPDH	13.77
	GAPDH	13.68
	GAPDH	13.62
	CYTOR	27.83
	CYTOR	27.75
	CYTOR	27.81
Normal-11	GAPDH	13.5
	GAPDH	13.51
	GAPDH	13.52
	CYTOR	29.51
	CYTOR	29.29
	CYTOR	29.19
Cancer-11	GAPDH	13.43
	GAPDH	13.51
	GAPDH	13.43
	CYTOR	28.01
	CYTOR	27.82
	CYTOR	28.21
Normal-12	GAPDH	13.43
	GAPDH	13.5
	GAPDH	13.51
	CYTOR	29.52
	CYTOR	29.43
	CYTOR	29.28
Cancer-12	GAPDH	13.53
	GAPDH	13.56
	GAPDH	13.44
	CYTOR	28.12
	CYTOR	27.88
	CYTOR	27.79
Normal-13	GAPDH	13.31
	GAPDH	13.52
	GAPDH	13.33
	CYTOR	29.64
	CYTOR	29.75
	CYTOR	29.96
Cancer-13	GAPDH	13.47
	GAPDH	13.69
	GAPDH	13.58
	CYTOR	28.12
	CYTOR	27.53
	CYTOR	27.59
Normal-14	GAPDH	13.27
	GAPDH	13.32
	GAPDH	13.31
	CYTOR	28.86
	CYTOR	28.8
	CYTOR	29.41
Cancer-14	GAPDH	13.34
	GAPDH	13.31
	GAPDH	13.32
	CYTOR	28.21
	CYTOR	28.17
	CYTOR	27.62
Normal-15	GAPDH	13.44
	GAPDH	13.56
	GAPDH	13.44
	CYTOR	29.73
	CYTOR	29.75
	CYTOR	29.88
Cancer-15	GAPDH	13.31
	GAPDH	13.32
	GAPDH	13.43
	CYTOR	28.51
	CYTOR	28.62
	CYTOR	28.61
Normal-16	GAPDH	13.4
	GAPDH	13.25
	GAPDH	13.43
	CYTOR	29.67
	CYTOR	29.82
	CYTOR	29.61
Cancer-16	GAPDH	13.33
	GAPDH	13.45
	GAPDH	13.32
	CYTOR	28.65
	CYTOR	28.32
	CYTOR	28.17
Normal-17	GAPDH	13.58
	GAPDH	13.57
	GAPDH	13.5
	CYTOR	29.3
	CYTOR	29.01
	CYTOR	29.15
Cancer-17	GAPDH	13.77
	GAPDH	13.67
	GAPDH	13.53
	CYTOR	27.86
	CYTOR	27.69
	CYTOR	27.58
Normal-18	GAPDH	13.69
	GAPDH	13.63
	GAPDH	13.78
	CYTOR	28.98
	CYTOR	29.07
	CYTOR	29.18
Cancer-18	GAPDH	13.53
	GAPDH	13.59
	GAPDH	13.68
	CYTOR	27.56
	CYTOR	27.69
	CYTOR	27.41
