# Supplementary material for: Long non-coding RNA CYTOR promotes the progression of melanoma via the miR-485-5p/GPI axis
Source: PeerJ journal article supplement (doi:10.7717/peerj.19284), 2025-04-22
Supplement: Original_Data.zip [file Fig. 1.C-Original data-CYTOR expression was assessed in melanoma cell lines.xlsx]

## Sheet: Sheet1
Cell		CT-value
replicate 1
PIGI	GAPDH	13.46
	GAPDH	13.49
	GAPDH	13.48
	CYTOR	30.33
	CYTOR	30.5
	CYTOR	30.51
SK-MEL-28	GAPDH	13.54
	GAPDH	13.67
	GAPDH	13.77
	CYTOR	29.65
	CYTOR	29.7
	CYTOR	29.63
MV3	GAPDH	13.54
	GAPDH	13.51
	GAPDH	13.54
	CYTOR	29.41
	CYTOR	29.57
	CYTOR	29.45
A875	GAPDH	13.61
	GAPDH	13.76
	GAPDH	13.69
	CYTOR	29.19
	CYTOR	29.54
	CYTOR	29.55
A375	GAPDH	13.55
	GAPDH	13.58
	GAPDH	13.56
	CYTOR	28.22
	CYTOR	28.09
	CYTOR	27.89
replicate 2
PIGI	GAPDH	13.46
	GAPDH	13.48
	GAPDH	13.46
	CYTOR	30.12
	CYTOR	30.92
	CYTOR	30.85
SK-MEL-28	GAPDH	13.74
	GAPDH	13.75
	GAPDH	13.68
	CYTOR	29.95
	CYTOR	29.85
	CYTOR	29.75
MV3	GAPDH	13.62
	GAPDH	13.69
	GAPDH	13.74
	CYTOR	29.71
	CYTOR	29.51
	CYTOR	29.6
A875	GAPDH	13.87
	GAPDH	13.6
	GAPDH	13.61
	CYTOR	29.16
	CYTOR	29.26
	CYTOR	29.16
A375	GAPDH	13.54
	GAPDH	13.52
	GAPDH	13.49
	CYTOR	27.87
	CYTOR	27.82
	CYTOR	27.72
replicate 3
PIGI	GAPDH	13.48
	GAPDH	13.49
	GAPDH	13.46
	CYTOR	30.48
	CYTOR	30.32
	CYTOR	30.71
SK-MEL-28	GAPDH	13.67
	GAPDH	13.69
	GAPDH	13.56
	CYTOR	29.76
	CYTOR	29.65
	CYTOR	29.69
MV3	GAPDH	13.58
	GAPDH	13.54
	GAPDH	13.52
	CYTOR	29.55
	CYTOR	29.75
	CYTOR	29.49
A875	GAPDH	13.76
	GAPDH	13.77
	GAPDH	13.87
	CYTOR	29.26
	CYTOR	29.14
	CYTOR	29.28
A375	GAPDH	13.51
	GAPDH	13.54
	GAPDH	13.52
	CYTOR	27.93
	CYTOR	27.72
	CYTOR	27.82
