# Supplementary material for: Long non-coding RNA CYTOR promotes the progression of melanoma via the miR-485-5p/GPI axis
Source: PeerJ journal article supplement (doi:10.7717/peerj.19284), 2025-04-22
Supplement: Original_Data.zip [file Fig. 1.D-Original data-Survival analysis.xlsx]

## Sheet: Sheet1
	Group
Time(months)	Low expression	High expression
15		1
72	1
24	1
21		1
14	1
19		1
38	1
22		1
31	1
6		1
34		1
57	1
14		1
65	1
24		1
