# Supplementary material for: Long non-coding RNA CYTOR promotes the progression of melanoma via the miR-485-5p/GPI axis
Source: PeerJ journal article supplement (doi:10.7717/peerj.19284), 2025-04-22
Supplement: Original_Data.zip [file Fig. 2.A-Original data-Transfection of si-CYTOR-2 and si-CYTOR-3 in A375 cells significantly downregulated CYTOR expression.xlsx]

## Sheet: Sheet1
Group		CT-value
si-NC	GAPDH	13.23
	GAPDH	13.32
	GAPDH	12.81
	CYTOR	27.52
	CYTOR	27.48
	CYTOR	28.17
si-CYTOR-1	GAPDH	13.42
	GAPDH	13.54
	GAPDH	13.32
	CYTOR	28.22
	CYTOR	28.22
	CYTOR	28.64
si-CYTOR-2	GAPDH	13.49
	GAPDH	13.63
	GAPDH	13.53
	CYTOR	29.31
	CYTOR	29.33
	CYTOR	29.51
si-CYTOR-3	GAPDH	13.62
	GAPDH	13.5
	GAPDH	13.32
	CYTOR	29.73
	CYTOR	29.56
	CYTOR	29.67
si-NC	GAPDH	13.73
	GAPDH	13.52
	GAPDH	13.65
	CYTOR	28.3
	CYTOR	28.33
	CYTOR	28.61
si-CYTOR-1	GAPDH	13.33
	GAPDH	13.43
	GAPDH	13.47
	CYTOR	29.44
	CYTOR	29.66
	CYTOR	28.85
si-CYTOR-2	GAPDH	13.42
	GAPDH	13.45
	GAPDH	13.31
	CYTOR	29.81
	CYTOR	29.75
	CYTOR	29.83
si-CYTOR-3	GAPDH	13.5
	GAPDH	13.7
	GAPDH	13.31
	CYTOR	29.92
	CYTOR	29.92
	CYTOR	29.95
si-NC	GAPDH	13.89
	GAPDH	13.65
	GAPDH	13.61
	CYTOR	27.99
	CYTOR	28.08
	CYTOR	27.92
si-CYTOR-1	GAPDH	13.97
	GAPDH	13.93
	GAPDH	13.87
	CYTOR	28.69
	CYTOR	28.74
	CYTOR	28.71
si-CYTOR-2	GAPDH	13.96
	GAPDH	14
	GAPDH	13.86
	CYTOR	29.1
	CYTOR	29.42
	CYTOR	29.23
si-CYTOR-3	GAPDH	13.83
	GAPDH	13.71
	GAPDH	13.73
	CYTOR	29.02
	CYTOR	29.17
	CYTOR	29.17
