# Supplementary material for: Long non-coding RNA CYTOR promotes the progression of melanoma via the miR-485-5p/GPI axis
Source: PeerJ journal article supplement (doi:10.7717/peerj.19284), 2025-04-22
Supplement: Original_Data.zip [file Fig. 2.A-Original data-Transfection of si-CYTOR-2 and si-CYTOR-3 in A875 cells significantly downregulated CYTOR expression.xlsx]

## Sheet: Sheet1
Group		CT-value
si-NC	GAPDH	13.58
	GAPDH	13.67
	GAPDH	13.63
	CYTOR	27.57
	CYTOR	27.68
	CYTOR	27.96
si-CYTOR-1	GAPDH	14.83
	GAPDH	14.16
	GAPDH	13.95
	CYTOR	29.18
	CYTOR	29.14
	CYTOR	28.8
si-CYTOR-2	GAPDH	13.78
	GAPDH	13.8
	GAPDH	13.76
	CYTOR	29.51
	CYTOR	29.3
	CYTOR	29.53
si-CYTOR-3	GAPDH	13.51
	GAPDH	13.53
	GAPDH	13.54
	CYTOR	29.25
	CYTOR	29.02
	CYTOR	29.17
si-NC	GAPDH	13.26
	GAPDH	13.31
	GAPDH	13.32
	CYTOR	28.5
	CYTOR	28.22
	CYTOR	28.64
si-CYTOR-1	GAPDH	13.34
	GAPDH	13.3
	GAPDH	13.33
	CYTOR	29.81
	CYTOR	29.31
	CYTOR	29.72
si-CYTOR-2	GAPDH	13.43
	GAPDH	13.57
	GAPDH	13.47
	CYTOR	29.62
	CYTOR	29.93
	CYTOR	29.81
si-CYTOR-3	GAPDH	13.26
	GAPDH	13.53
	GAPDH	13.45
	CYTOR	29.94
	CYTOR	29.98
	CYTOR	29.99
si-NC	GAPDH	13.44
	GAPDH	13.43
	GAPDH	13.45
	CYTOR	28.63
	CYTOR	28.22
	CYTOR	28.17
si-CYTOR-1	GAPDH	13.62
	GAPDH	13.55
	GAPDH	13.73
	CYTOR	29.83
	CYTOR	29.72
	CYTOR	29.35
si-CYTOR-2	GAPDH	13.33
	GAPDH	13.34
	GAPDH	13.42
	CYTOR	29.46
	CYTOR	29.55
	CYTOR	29.56
si-CYTOR-3	GAPDH	13.32
	GAPDH	13.66
	GAPDH	13.51
	CYTOR	30.17
	CYTOR	29.89
	CYTOR	29.77
