# Supplementary material for: Long non-coding RNA CYTOR promotes the progression of melanoma via the miR-485-5p/GPI axis
Source: PeerJ journal article supplement (doi:10.7717/peerj.19284), 2025-04-22
Supplement: Original_Data.zip [file Fig. 2.B-Original data-Cell proliferation was assessed using the CCK-8 assay-A375.xlsx]

## Sheet: CCK8-A375-OD-value
0H
Group	OD-value
si-NC	0.344
si-NC	0.3264
si-NC	0.3528
si-CYTOR-2	0.32
si-CYTOR-2	0.3336
si-CYTOR-2	0.3216
si-CYTOR-3	0.3312
si-CYTOR-3	0.3288
si-CYTOR-3	0.324
24H
Group	OD-value
si-NC	0.5031
si-NC	0.6208
si-NC	0.7004
si-CYTOR-2	0.3891
si-CYTOR-2	0.4055
si-CYTOR-2	0.4291
si-CYTOR-3	0.4201
si-CYTOR-3	0.3985
si-CYTOR-3	0.4337
48H
Group	OD-value
si-NC	0.9091
si-NC	0.8054
si-NC	1.0356
si-CYTOR-2	0.5891
si-CYTOR-2	0.7021
si-CYTOR-2	0.4997
si-CYTOR-3	0.6092
si-CYTOR-3	0.4912
si-CYTOR-3	0.6885
72H
Group	OD-value
si-NC	1.286
si-NC	1.1993
si-NC	1.4097
si-CYTOR-2	0.8902
si-CYTOR-2	1.0885
si-CYTOR-2	0.8453
si-CYTOR-3	0.7901
si-CYTOR-3	0.9023
si-CYTOR-3	1.0228
96H
Group	OD-value
si-NC	1.9986
si-NC	1.7089
si-NC	1.8702
si-CYTOR-2	1.2766
si-CYTOR-2	1.3089
si-CYTOR-2	1.58
si-CYTOR-3	1.421
si-CYTOR-3	1.1814
si-CYTOR-3	1.4393
