# Supplementary material for: Long non-coding RNA CYTOR promotes the progression of melanoma via the miR-485-5p/GPI axis
Source: PeerJ journal article supplement (doi:10.7717/peerj.19284), 2025-04-22
Supplement: Original_Data.zip [file Fig. 2.B-Original data-Cell proliferation was assessed using the CCK-8 assay-A875.xlsx]

## Sheet: CCK8-A875-OD-value
0H
Group	OD-value
si-NC	0.342
si-NC	0.319
si-NC	0.3571
si-CYTOR-2	0.319
si-CYTOR-2	0.334
si-CYTOR-2	0.3309
si-CYTOR-3	0.341
si-CYTOR-3	0.3171
si-CYTOR-3	0.3239
24H
Group	OD-value
si-NC	0.4891
si-NC	0.5883
si-NC	0.6916
si-CYTOR-2	0.399
si-CYTOR-2	0.4257
si-CYTOR-2	0.3987
si-CYTOR-3	0.4179
si-CYTOR-3	0.4012
si-CYTOR-3	0.4401
48H
Group	OD-value
si-NC	0.8893
si-NC	1.1257
si-NC	0.9321
si-CYTOR-2	0.5721
si-CYTOR-2	0.6994
si-CYTOR-2	0.5028
si-CYTOR-3	0.5899
si-CYTOR-3	0.6001
si-CYTOR-3	0.7501
72H
Group	OD-value
si-NC	1.1789
si-NC	1.2996
si-NC	1.4206
si-CYTOR-2	0.876
si-CYTOR-2	0.799
si-CYTOR-2	1.13
si-CYTOR-3	0.771
si-CYTOR-3	0.8321
si-CYTOR-3	0.9526
96H
Group	OD-value
si-NC	1.667
si-NC	1.781
si-NC	2.091
si-CYTOR-2	1.2012
si-CYTOR-2	1.278
si-CYTOR-2	1.5812
si-CYTOR-3	1.4521
si-CYTOR-3	1.0899
si-CYTOR-3	1.4469
