# Supplementary material for: Long non-coding RNA CYTOR promotes the progression of melanoma via the miR-485-5p/GPI axis
Source: PeerJ journal article supplement (doi:10.7717/peerj.19284), 2025-04-22
Supplement: Original_Data.zip [file Fig. 2.C-Original data-Wound-healing-A375.xlsx]

## Sheet: Sheet1
0H
Group	Area
si-NC	1838393
si-NC	1852085
si-NC	1805307
si-CYTOR-2	1833361
si-CYTOR-2	1835032
si-CYTOR-2	1850848
si-CYTOR-3	1840760
si-CYTOR-3	1854676
si-CYTOR-3	1834752
24H
Group	Area
si-NC	965422
si-NC	995837
si-NC	955323
si-CYTOR-2	1497376
si-CYTOR-2	1472264
si-CYTOR-2	1458038
si-CYTOR-3	1539730
si-CYTOR-3	1481443
si-CYTOR-3	1495352
