# Supplementary material for: Long non-coding RNA CYTOR promotes the progression of melanoma via the miR-485-5p/GPI axis
Source: PeerJ journal article supplement (doi:10.7717/peerj.19284), 2025-04-22
Supplement: Original_Data.zip [file Fig. 2.C-Original data-Wound-healing-A875.xlsx]

## Sheet: Sheet1
0H
Group	Area
si-NC	1944308
si-NC	1955145
si-NC	1969856
si-CYTOR-2	1936121
si-CYTOR-2	1911865
si-CYTOR-2	1901476
si-CYTOR-3	1918690
si-CYTOR-3	1883321
si-CYTOR-3	1926697
24H
Group	Area
si-NC	952952
si-NC	846088
si-NC	962842
si-CYTOR-2	1385310
si-CYTOR-2	1415578
si-CYTOR-2	1383516
si-CYTOR-3	1444108
si-CYTOR-3	1405570
si-CYTOR-3	1395926
