# Supplementary material for: Long non-coding RNA CYTOR promotes the progression of melanoma via the miR-485-5p/GPI axis
Source: PeerJ journal article supplement (doi:10.7717/peerj.19284), 2025-04-22
Supplement: Original_Data.zip [file Fig. 2.D-Original data-transwell-A375.xlsx]

## Sheet: Sheet1
Group	Invasion cell count
si-NC	31
si-NC	38
si-NC	36
si-CYTOR-2	16
si-CYTOR-2	21
si-CYTOR-2	19
si-CYTOR-3	25
si-CYTOR-3	29
si-CYTOR-3	24
