# Supplementary material for: Long non-coding RNA CYTOR promotes the progression of melanoma via the miR-485-5p/GPI axis
Source: PeerJ journal article supplement (doi:10.7717/peerj.19284), 2025-04-22
Supplement: Original_Data.zip [file Fig. 2.D-Original data-transwell-A875.xlsx]

## Sheet: Sheet1
Group	Invasion cell count
si-NC	45
si-NC	40
si-NC	35
si-CYTOR-2	26
si-CYTOR-2	25
si-CYTOR-2	20
si-CYTOR-3	28
si-CYTOR-3	30
si-CYTOR-3	22
