# Supplementary material for: Long non-coding RNA CYTOR promotes the progression of melanoma via the miR-485-5p/GPI axis
Source: PeerJ journal article supplement (doi:10.7717/peerj.19284), 2025-04-22
Supplement: Original_Data.zip [file Fig. 3.A-Original data-Transfection of pcDNA-CYTOR in MV3 significantly upregulated CYTOR expression.xlsx]

## Sheet: Sheet1
Group		CT-value
replicate 1
pcDNA NC	GAPDH	13.77
	GAPDH	13.81
	GAPDH	13.82
	CYTOR	30.62
	CYTOR	30.62
	CYTOR	30.03
pcDNA CYTOR	GAPDH	13.82
	GAPDH	13.74
	GAPDH	13.79
	CYTOR	27.12
	CYTOR	27
	CYTOR	27.05
replicate 2
pcDNA NC	GAPDH	13.76
	GAPDH	13.73
	GAPDH	13.77
	CYTOR	30.48
	CYTOR	30.67
	CYTOR	30.64
pcDNA CYTOR	GAPDH	13.95
	GAPDH	13.76
	GAPDH	14.1
	CYTOR	27.49
	CYTOR	27.18
	CYTOR	27
replicate 3
pcDNA NC	GAPDH	13.73
	GAPDH	13.71
	GAPDH	13.78
	CYTOR	30.53
	CYTOR	30.72
	CYTOR	30.58
pcDNA CYTOR	GAPDH	14.34
	GAPDH	14.47
	GAPDH	14.1
	CYTOR	26.94
	CYTOR	27.23
	CYTOR	27.11
