# Supplementary material for: Long non-coding RNA CYTOR promotes the progression of melanoma via the miR-485-5p/GPI axis
Source: PeerJ journal article supplement (doi:10.7717/peerj.19284), 2025-04-22
Supplement: Original_Data.zip [file Fig. 3.A-Original data-Transfection of pcDNA-CYTOR in SK-MEL-28 significantly upregulated CYTOR expression.xlsx]

## Sheet: Sheet1
Group		CT-value
replicate 1
pcDNA NC	GAPDH	13.78
	GAPDH	13.87
	GAPDH	13.88
	CYTOR	30.61
	CYTOR	30.42
	CYTOR	30.82
pcDNA CYTOR	GAPDH	13.65
	GAPDH	13.71
	GAPDH	13.66
	CYTOR	27.33
	CYTOR	27.43
	CYTOR	27.25
replicate 2
pcDNA NC	GAPDH	14.25
	GAPDH	14.27
	GAPDH	14
	CYTOR	30.3
	CYTOR	30.44
	CYTOR	30.23
pcDNA CYTOR	GAPDH	13.78
	GAPDH	13.69
	GAPDH	13.77
	CYTOR	27.09
	CYTOR	27.26
	CYTOR	27.02
replicate 3
pcDNA NC	GAPDH	13.73
	GAPDH	14.05
	GAPDH	14.03
	CYTOR	30.54
	CYTOR	30.1
	CYTOR	29.92
pcDNA CYTOR	GAPDH	13.88
	GAPDH	13.77
	GAPDH	13.76
	CYTOR	27.14
	CYTOR	27.23
	CYTOR	27.56
