# Supplementary material for: Long non-coding RNA CYTOR promotes the progression of melanoma via the miR-485-5p/GPI axis
Source: PeerJ journal article supplement (doi:10.7717/peerj.19284), 2025-04-22
Supplement: Original_Data.zip [file Fig. 3.B-Original data-Cell proliferation was assessed with the CCK-8 assay-MV3.xlsx]

## Sheet: Sheet1
Group	OD-value
0H
pcDNA NC	0.3409
pcDNA NC	0.3201
pcDNA NC	0.3392
pcDNA CYTOR	0.3583
pcDNA CYTOR	0.3225
pcDNA CYTOR	0.3112
24H
pcDNA NC	0.4025
pcDNA NC	0.5994
pcDNA NC	0.6026
pcDNA CYTOR	0.7328
pcDNA CYTOR	0.721
pcDNA CYTOR	0.9079
48H
pcDNA NC	0.9967
pcDNA NC	1.1008
pcDNA NC	1.0972
pcDNA CYTOR	1.2099
pcDNA CYTOR	1.4566
pcDNA CYTOR	1.4037
72H
pcDNA NC	1.5002
pcDNA NC	1.2787
pcDNA NC	1.3025
pcDNA CYTOR	1.5997
pcDNA CYTOR	1.7009
pcDNA CYTOR	1.8206
96H
pcDNA NC	1.6098
pcDNA NC	1.7804
pcDNA NC	1.8704
pcDNA CYTOR	2.0989
pcDNA CYTOR	2.3305
pcDNA CYTOR	2.1091
