# Supplementary material for: Long non-coding RNA CYTOR promotes the progression of melanoma via the miR-485-5p/GPI axis
Source: PeerJ journal article supplement (doi:10.7717/peerj.19284), 2025-04-22
Supplement: Original_Data.zip [file Fig. 3.B-Original data-Cell proliferation was assessed with the CCK-8 assay-SK-MEL-28.xlsx]

## Sheet: Sheet1
Group	OD-value
0H
pcDNA NC	0.3421
pcDNA NC	0.3405
pcDNA NC	0.3199
pcDNA CYTOR	0.3501
pcDNA CYTOR	0.3419
pcDNA CYTOR	0.3182
24H
pcDNA NC	0.5012
pcDNA NC	0.6098
pcDNA NC	0.627
pcDNA CYTOR	0.7211
pcDNA CYTOR	0.8013
pcDNA CYTOR	0.8344
48H
pcDNA NC	0.8069
pcDNA NC	1.037
pcDNA NC	0.987
pcDNA CYTOR	1.2355
pcDNA CYTOR	1.1716
pcDNA CYTOR	1.3057
72H
pcDNA NC	1.2256
pcDNA NC	1.348
pcDNA NC	1.391
pcDNA CYTOR	1.6008
pcDNA CYTOR	1.5094
pcDNA CYTOR	1.6996
96H
pcDNA NC	1.621
pcDNA NC	1.794
pcDNA NC	1.8903
pcDNA CYTOR	2.1094
pcDNA CYTOR	2.3132
pcDNA CYTOR	2.3089
