# Supplementary material for: Long non-coding RNA CYTOR promotes the progression of melanoma via the miR-485-5p/GPI axis
Source: PeerJ journal article supplement (doi:10.7717/peerj.19284), 2025-04-22
Supplement: Original_Data.zip [file Fig. 3.C-Original data-Wound-healing-MV3.xlsx]

## Sheet: Sheet1
0H
Group	Area
Group	Area
pcDNA NC	1808765
pcDNA NC	1745992
pcDNA NC	1783514
pcDNA CYTOR	1868185
pcDNA CYTOR	1808218
pcDNA CYTOR	1812532
24H
Group	Area
pcDNA NC	1287247
pcDNA NC	1197556
pcDNA NC	1301346
pcDNA CYTOR	612795
pcDNA CYTOR	509550
pcDNA CYTOR	535945
