# Supplementary material for: Long non-coding RNA CYTOR promotes the progression of melanoma via the miR-485-5p/GPI axis
Source: PeerJ journal article supplement (doi:10.7717/peerj.19284), 2025-04-22
Supplement: Original_Data.zip [file Fig. 3.C-Original data-Wound-healing-SK-MEL-28.xlsx]

## Sheet: Sheet1
0H
Group	Area
pcDNA NC	1784314
pcDNA NC	1692510
pcDNA NC	1714790
pcDNA CYTOR	1686991
pcDNA CYTOR	1744284
pcDNA CYTOR	1726629
24H
Group	Area
pcDNA NC	970597
pcDNA NC	980427
pcDNA NC	1086564
pcDNA CYTOR	509717
pcDNA CYTOR	493204
pcDNA CYTOR	433077
