# Supplementary material for: Long non-coding RNA CYTOR promotes the progression of melanoma via the miR-485-5p/GPI axis
Source: PeerJ journal article supplement (doi:10.7717/peerj.19284), 2025-04-22
Supplement: Original_Data.zip [file Fig. 3.D-Original data-transwell-MV3.xlsx]

## Sheet: Sheet1
Group	Invasion cell count
pcDNA NC	52
pcDNA NC	39
pcDNA NC	41
pcDNA CYTOR	110
pcDNA CYTOR	91
pcDNA CYTOR	121
