# Supplementary material for: Long non-coding RNA CYTOR promotes the progression of melanoma via the miR-485-5p/GPI axis
Source: PeerJ journal article supplement (doi:10.7717/peerj.19284), 2025-04-22
Supplement: Original_Data.zip [file Fig. 3.D-Original data-transwell-SK-MEL-28.xlsx]

## Sheet: Sheet1
Group	Invasion cell count
pcDNA NC	41
pcDNA NC	40
pcDNA NC	42
pcDNA CYTOR	121
pcDNA CYTOR	127
pcDNA CYTOR	90
