# Supplementary material for: Long non-coding RNA CYTOR promotes the progression of melanoma via the miR-485-5p/GPI axis
Source: PeerJ journal article supplement (doi:10.7717/peerj.19284), 2025-04-22
Supplement: Original_Data.zip [file Fig. 4.C-Original data-luciferase reporter assay-miR-485-5p-CYTOR.xlsx]

## Sheet: Sheet1
duplicate well-1		Firefly			Renilla
plasmid	Oligo	replicate 1	replicate 2	replicate 3	replicate 1	replicate 2	replicate 3
CYTOR WT	NC	593277	610060	607265	207260	211701	205444
	miR-485-5p	352200	340664	339852	224361	214452	212525
CYTOR MUT	NC	687692	630241	656825	240482	232351	220685
	miR-485-5p	634666	599432	610152	221911	205042	212014
empty vector	NC	533285	514128	534247	171977	163409	162091
	miR-485-5p	473398	484583	476069	162700	147631	144476
duplicate well-2		Firefly			Renilla
plasmid	Oligo	replicate 1	replicate 2	replicate 3	replicate 1	replicate 2	replicate 3
CYTOR WT	NC	604250	611010	652298	201356	198590	202668
	miR-485-5p	342408	344420	360551	205324	204844	207199
CYTOR MUT	NC	648812	704987	692463	217754	225276	239057
	miR-485-5p	619316	625059	673562	211199	210081	226520
empty vector	NC	506864	491151	547798	153987	153615	168156
	miR-485-5p	491215	487071	478099	142445	148373	155115
duplicate well-3		Firefly			Renilla
plasmid	Oligo	replicate 1	replicate 2	replicate 3	replicate 1	replicate 2	replicate 3
CYTOR WT	NC	576253	572130	594343	197310	197185	203322
	miR-485-5p	349800	330448	309256	219980	198054	201762
CYTOR MUT	NC	673969	663267	658054	236261	226328	233696
	miR-485-5p	638990	664193	649966	221703	220098	226212
empty vector	NC	522472	509084	525699	161282	161896	162883
	miR-485-5p	488013	489197	470198	151669	148357	152063
