# Supplementary material for: Long non-coding RNA CYTOR promotes the progression of melanoma via the miR-485-5p/GPI axis
Source: PeerJ journal article supplement (doi:10.7717/peerj.19284), 2025-04-22
Supplement: Original_Data.zip [file Fig. 4.D-Original data-miR-485-5p expression in cells.xlsx]

## Sheet: Sheet1
Cell		CT-Value
replicate 1
PIG1	u6	14.46
	u6	14.48
	u6	14.29
	miR-485-5p	29.08
	miR-485-5p	29.27
	miR-485-5p	29.2
SK-MEL-28	u6	14.12
	u6	14.24
	u6	14.2
	miR-485-5p	29.73
	miR-485-5p	29.8
	miR-485-5p	29.79
MV3	u6	14.23
	u6	14.21
	u6	14.19
	miR-485-5p	29.6
	miR-485-5p	29.69
	miR-485-5p	29.63
A875	u6	14.23
	u6	14.29
	u6	14.21
	miR-485-5p	29.76
	miR-485-5p	29.93
	miR-485-5p	29.87
A375	u6	14.24
	u6	14.2
	u6	14.05
	miR-485-5p	29.83
	miR-485-5p	30.11
	miR-485-5p	29.89
replicate 2
PIG1	u6	14.54
	u6	14.53
	u6	14.49
	miR-485-5p	29.08
	miR-485-5p	29.04
	miR-485-5p	29.07
SK-MEL-28	u6	14.26
	u6	14.12
	u6	14.11
	miR-485-5p	29.63
	miR-485-5p	29.46
	miR-485-5p	29.61
MV3	u6	14.24
	u6	14.24
	u6	14.29
	miR-485-5p	29.56
	miR-485-5p	29.55
	miR-485-5p	29.56
A875	u6	14.26
	u6	14.27
	u6	14.23
	miR-485-5p	29.7
	miR-485-5p	29.91
	miR-485-5p	29.8
A375	u6	14.1
	u6	14.01
	u6	14.04
	miR-485-5p	29.99
	miR-485-5p	30.08
	miR-485-5p	29.96
replicate 3
PIG1	u6	14.41
	u6	14.31
	u6	14.31
	miR-485-5p	29.09
	miR-485-5p	28.99
	miR-485-5p	29.13
SK-MEL-28	u6	14.15
	u6	14.04
	u6	14.15
	miR-485-5p	29.53
	miR-485-5p	29.72
	miR-485-5p	29.79
MV3	u6	14.29
	u6	14.29
	u6	14.3
	miR-485-5p	29.52
	miR-485-5p	29.66
	miR-485-5p	29.69
A875	u6	14.1
	u6	14.15
	u6	14.16
	miR-485-5p	29.82
	miR-485-5p	29.95
	miR-485-5p	29.91
A375	u6	14.14
	u6	14.11
	u6	14
	miR-485-5p	29.94
	miR-485-5p	29.97
	miR-485-5p	29.97
