# Supplementary material for: Long non-coding RNA CYTOR promotes the progression of melanoma via the miR-485-5p/GPI axis
Source: PeerJ journal article supplement (doi:10.7717/peerj.19284), 2025-04-22
Supplement: Original_Data.zip [file Fig. 4.E-Original data-miR-485-5p expression in MV3 and A875 cells after transfection with pcDNA CYTOR.xlsx]

## Sheet: mv3
Group		CT-Value
replicate 1
pcDNA NC	u6	14.69
	u6	14.78
	u6	14.76
	miR-485-5p	28.43
	miR-485-5p	28.49
	miR-485-5p	28.48
pcDNA CYTOR	u6	14.58
	u6	14.69
	u6	14.65
	miR-485-5p	29.07
	miR-485-5p	29.23
	miR-485-5p	29.16
replicate 2
pcDNA NC	u6	14.74
	u6	14.76
	u6	14.71
	miR-485-5p	28.54
	miR-485-5p	28.52
	miR-485-5p	28.43
pcDNA CYTOR	u6	14.63
	u6	14.69
	u6	14.7
	miR-485-5p	29.11
	miR-485-5p	29.01
	miR-485-5p	29.09
replicate 3
pcDNA NC	u6	14.69
	u6	14.77
	u6	14.73
	miR-485-5p	28.49
	miR-485-5p	28.51
	miR-485-5p	28.49
pcDNA CYTOR	u6	14.6
	u6	14.69
	u6	14.71
	miR-485-5p	29.08
	miR-485-5p	29.22
	miR-485-5p	29.09

## Sheet: A875
Group		CT-Value
replicate 1
pcDNA NC	u6	14.69
	u6	14.76
	u6	14.76
	miR-485-5p	28.54
	miR-485-5p	28.54
	miR-485-5p	28.43
pcDNA CYTOR	u6	14.58
	u6	14.65
	u6	14.66
	miR-485-5p	29.11
	miR-485-5p	29.25
	miR-485-5p	29.04
replicate 2
pcDNA NC	u6	14.73
	u6	14.73
	u6	14.63
	miR-485-5p	28.43
	miR-485-5p	28.54
	miR-485-5p	28.52
pcDNA CYTOR	u6	14.65
	u6	14.68
	u6	14.7
	miR-485-5p	29.16
	miR-485-5p	29.21
	miR-485-5p	29.08
replicate 3
pcDNA NC	u6	14.72
	u6	14.69
	u6	14.7
	miR-485-5p	28.44
	miR-485-5p	28.48
	miR-485-5p	28.52
pcDNA CYTOR	u6	14.62
	u6	14.69
	u6	14.75
	miR-485-5p	29.14
	miR-485-5p	29.06
	miR-485-5p	29.05
