# Supplementary material for: Long non-coding RNA CYTOR promotes the progression of melanoma via the miR-485-5p/GPI axis
Source: PeerJ journal article supplement (doi:10.7717/peerj.19284), 2025-04-22
Supplement: Original_Data.zip [file Fig. 4.E-Original data-miR-485-5p expression in MV3 and A875 cells after transfection with si-CYTOR.xlsx]

## Sheet: MV3
Group		CT-value
replicate 1
si-NC	u6	14.62
	u6	14.63
	u6	14.72
	mi-485-5P	29.43
	mi-485-5P	29.61
	mi-485-5P	29.5
si-CYTOR-2	u6	14.74
	u6	14.6
	u6	14.69
	mi-485-5P	28.63
	mi-485-5P	28.64
	mi-485-5P	28.64
si-CYTOR-3	u6	14.7
	u6	14.75
	u6	14.74
	mi-485-5P	28.66
	mi-485-5P	28.56
	mi-485-5P	28.58
replicate 2
si-NC	u6	14.62
	u6	14.7
	u6	14.72
	mi-485-5P	29.33
	mi-485-5P	29.48
	mi-485-5P	29.42
si-CYTOR-2	u6	14.73
	u6	14.67
	u6	14.72
	mi-485-5P	28.62
	mi-485-5P	28.59
	mi-485-5P	28.61
si-CYTOR-3	u6	14.73
	u6	14.67
	u6	14.74
	mi-485-5P	28.62
	mi-485-5P	28.6
	mi-485-5P	28.64
replicate 3
si-NC	u6	14.63
	u6	14.62
	u6	14.65
	mi-485-5P	29.6
	mi-485-5P	29.47
	mi-485-5P	29.52
si-CYTOR-2	u6	14.73
	u6	14.69
	u6	14.72
	mi-485-5P	28.58
	mi-485-5P	28.61
	mi-485-5P	28.6
si-CYTOR-3	u6	14.77
	u6	14.76
	u6	14.73
	mi-485-5P	28.65
	mi-485-5P	28.6
	mi-485-5P	28.58

## Sheet: A875
Group		CT-value
replicate 1
si-NC	u6	14.61
	u6	14.67
	u6	14.71
	mi-485-5P	29.45
	mi-485-5P	29.65
	mi-485-5P	29.55
si-CYTOR-2	u6	14.71
	u6	14.66
	u6	14.69
	mi-485-5P	28.54
	mi-485-5P	28.65
	mi-485-5P	28.61
si-CYTOR-3	u6	14.71
	u6	14.74
	u6	14.59
	mi-485-5P	28.64
	mi-485-5P	28.68
	mi-485-5P	28.62
replicate 1
si-NC	u6	14.62
	u6	14.62
	u6	14.63
	mi-485-5P	29.43
	mi-485-5P	29.33
	mi-485-5P	29.6
si-CYTOR-2	u6	14.74
	u6	14.73
	u6	14.73
	mi-485-5P	28.63
	mi-485-5P	28.62
	mi-485-5P	28.58
si-CYTOR-3	u6	14.7
	u6	14.73
	u6	14.77
	mi-485-5P	28.66
	mi-485-5P	28.62
	mi-485-5P	28.65
replicate 1
si-NC	u6	14.63
	u6	14.7
	u6	14.62
	mi-485-5P	29.61
	mi-485-5P	29.48
	mi-485-5P	29.47
si-CYTOR-2	u6	14.6
	u6	14.67
	u6	14.69
	mi-485-5P	28.64
	mi-485-5P	28.59
	mi-485-5P	28.61
si-CYTOR-3	u6	14.75
	u6	14.67
	u6	14.76
	mi-485-5P	28.56
	mi-485-5P	28.6
	mi-485-5P	28.6
