# Supplementary material for: Long non-coding RNA CYTOR promotes the progression of melanoma via the miR-485-5p/GPI axis
Source: PeerJ journal article supplement (doi:10.7717/peerj.19284), 2025-04-22
Supplement: Original_Data.zip [file Fig. 4.F-Original data-miR-485-5p expression in 18 pairs of melanoma tumors and adjacent non-tumorous tissues.xlsx]

## Sheet: Sheet1
Group		CT-Value
Normal-1	GAPDH	14.31
	GAPDH	14.39
	GAPDH	14.4
	miR-485-5p	29.33
	miR-485-5p	29.07
	miR-485-5p	29.13
Cancer-1	GAPDH	14.25
	GAPDH	14.28
	GAPDH	14.29
	miR-485-5p	29.61
	miR-485-5p	29.66
	miR-485-5p	29.81
Normal-2	GAPDH	14.44
	GAPDH	14.33
	GAPDH	14.28
	miR-485-5p	28.9
	miR-485-5p	29.16
	miR-485-5p	29.13
Cancer-2	GAPDH	14.3
	GAPDH	14.33
	GAPDH	14.31
	miR-485-5p	29.62
	miR-485-5p	29.84
	miR-485-5p	29.69
Normal-3	GAPDH	14.12
	GAPDH	14.33
	GAPDH	14.15
	miR-485-5p	29.05
	miR-485-5p	29.23
	miR-485-5p	29.43
Cancer-3	GAPDH	14.21
	GAPDH	14.32
	GAPDH	14.34
	miR-485-5p	29.71
	miR-485-5p	29.81
	miR-485-5p	29.89
Normal-4	GAPDH	14.17
	GAPDH	14.17
	GAPDH	14.4
	miR-485-5p	29.01
	miR-485-5p	29.04
	miR-485-5p	28.96
Cancer-4	GAPDH	14.06
	GAPDH	13.96
	GAPDH	14.2
	miR-485-5p	29.93
	miR-485-5p	29.99
	miR-485-5p	29.83
Normal-5	GAPDH	14.18
	GAPDH	14.24
	GAPDH	14.36
	miR-485-5p	28.95
	miR-485-5p	29.11
	miR-485-5p	29.08
Cancer-5	GAPDH	14
	GAPDH	13.96
	GAPDH	14.01
	miR-485-5p	29.91
	miR-485-5p	29.99
	miR-485-5p	29.99
Normal-6	GAPDH	14.25
	GAPDH	14.22
	GAPDH	14.34
	miR-485-5p	29.07
	miR-485-5p	29.03
	miR-485-5p	29.59
Cancer-6	GAPDH	14.11
	GAPDH	14.36
	GAPDH	14.15
	miR-485-5p	29.97
	miR-485-5p	30.04
	miR-485-5p	29.99
Normal-7	GAPDH	14.34
	GAPDH	14.35
	GAPDH	14.02
	miR-485-5p	28.96
	miR-485-5p	29.08
	miR-485-5p	29.08
Cancer-7	GAPDH	14.15
	GAPDH	14.06
	GAPDH	14.17
	miR-485-5p	29.83
	miR-485-5p	29.99
	miR-485-5p	29.99
Normal-8	GAPDH	14.25
	GAPDH	14.32
	GAPDH	14.29
	miR-485-5p	28.82
	miR-485-5p	28.83
	miR-485-5p	28.93
Cancer-8	GAPDH	14
	GAPDH	14.15
	GAPDH	13.93
	miR-485-5p	29.85
	miR-485-5p	29.99
	miR-485-5p	29.97
Normal-9	GAPDH	14.03
	GAPDH	14.14
	GAPDH	14.17
	miR-485-5p	29.05
	miR-485-5p	29.11
	miR-485-5p	29.08
Cancer-9	GAPDH	14.23
	GAPDH	14.19
	GAPDH	14.2
	miR-485-5p	29.93
	miR-485-5p	29.99
	miR-485-5p	29.91
Normal-10	GAPDH	14.08
	GAPDH	14.14
	GAPDH	14.16
	miR-485-5p	28.89
	miR-485-5p	28.89
	miR-485-5p	28.95
Cancer-10	GAPDH	14.11
	GAPDH	14.09
	GAPDH	13.97
	miR-485-5p	29.88
	miR-485-5p	29.86
	miR-485-5p	29.95
Normal-11	GAPDH	14.62
	GAPDH	14.71
	GAPDH	14.59
	miR-485-5p	28.56
	miR-485-5p	28.64
	miR-485-5p	28.61
Cancer-11	GAPDH	14.7
	GAPDH	14.72
	GAPDH	14.66
	miR-485-5p	29.65
	miR-485-5p	29.71
	miR-485-5p	29.56
Normal-12	GAPDH	14.31
	GAPDH	14.28
	GAPDH	14.22
	miR-485-5p	29
	miR-485-5p	29.36
	miR-485-5p	29.31
Cancer-12	GAPDH	14.22
	GAPDH	14.21
	GAPDH	14.16
	miR-485-5p	29.65
	miR-485-5p	29.84
	miR-485-5p	30.09
Normal-13	GAPDH	14.22
	GAPDH	14.23
	GAPDH	14.27
	miR-485-5p	29.26
	miR-485-5p	29.21
	miR-485-5p	29.41
Cancer-13	GAPDH	14.25
	GAPDH	14.21
	GAPDH	14.29
	miR-485-5p	29.94
	miR-485-5p	29.8
	miR-485-5p	29.78
Normal-14	GAPDH	14.63
	GAPDH	14.71
	GAPDH	14.69
	miR-485-5p	28.55
	miR-485-5p	28.59
	miR-485-5p	28.63
Cancer-14	GAPDH	14.73
	GAPDH	14.71
	GAPDH	14.7
	miR-485-5p	29.49
	miR-485-5p	29.39
	miR-485-5p	29.53
Normal-15	GAPDH	14.66
	GAPDH	14.66
	GAPDH	14.71
	miR-485-5p	28.55
	miR-485-5p	28.46
	miR-485-5p	28.49
Cancer-15	GAPDH	14.71
	GAPDH	14.73
	GAPDH	14.66
	miR-485-5p	29.33
	miR-485-5p	29.24
	miR-485-5p	29.32
Normal-16	GAPDH	14.71
	GAPDH	14.68
	GAPDH	14.73
	miR-485-5p	28.48
	miR-485-5p	28.61
	miR-485-5p	28.69
Cancer-16	GAPDH	14.72
	GAPDH	14.68
	GAPDH	14.7
	miR-485-5p	29.4
	miR-485-5p	29.55
	miR-485-5p	29.51
Normal-17	GAPDH	14.04
	GAPDH	14.15
	GAPDH	14.03
	miR-485-5p	29.03
	miR-485-5p	28.87
	miR-485-5p	28.75
Cancer-17	GAPDH	14.03
	GAPDH	13.95
	GAPDH	14.09
	miR-485-5p	29.94
	miR-485-5p	29.86
	miR-485-5p	29.77
Normal-18	GAPDH	13.77
	GAPDH	14
	GAPDH	14.02
	miR-485-5p	29.07
	miR-485-5p	29.14
	miR-485-5p	29.01
Cancer-18	GAPDH	14.03
	GAPDH	14
	GAPDH	13.76
	miR-485-5p	29.98
	miR-485-5p	29.96
	miR-485-5p	29.99
