# Supplementary material for: Long non-coding RNA CYTOR promotes the progression of melanoma via the miR-485-5p/GPI axis
Source: PeerJ journal article supplement (doi:10.7717/peerj.19284), 2025-04-22
Supplement: Original_Data.zip [file Fig. 5.B-Original data-luciferase reporter assay-miR-485-5p-GPI.xlsx]

## Sheet: Sheet1
duplicate well-1		Firefly			Renilla
plasmid	Oligo	replicate 1	replicate 2	replicate 3	replicate 1	replicate 2	replicate 3
GPI WT	NC	452240	425173	432801	178600	162669	168427
	miR-485-5p	261629	229710	204469	194846	185477	169059
GPI MUT	NC	523880	471320	479175	205030	188793	181015
	miR-485-5p	544794	492644	514418	207667	197103	199007
empty vector	NC	572841	531324	533908	194831	179236	175273
	miR-485-5p	486117	490192	498000	169786	165992	169067
duplicate well-2		Firefly			Renilla
plasmid	Oligo	replicate 1	replicate 2	replicate 3	replicate 1	replicate 2	replicate 3
GPI WT	NC	429376	421583	465482	164409	157142	176609
	miR-485-5p	198888	204117	225168	173181	170737	175400
GPI MUT	NC	475497	492750	509759	192924	203859	187802
	miR-485-5p	501683	492621	504737	182124	190174	214915
empty vector	NC	523435	528359	542190	174519	187195	185352
	miR-485-5p	506403	547991	521603	167898	175582	179140
duplicate well-3		Firefly			Renilla
plasmid	Oligo	replicate 1	replicate 2	replicate 3	replicate 1	replicate 2	replicate 3
GPI WT	NC	436842	428256	453406	176819	167307	184504
	miR-485-5p	265949	252894	223119	200129	194711	172035
GPI MUT	NC	509979	498290	488342	207045	194449	201006
	miR-485-5p	521696	521135	530781	224019	198001	212753
empty vector	NC	528751	543198	548391	175780	186324	186870
	miR-485-5p	519266	524364	569175	180512	172447	184453
