# Supplementary material for: Long non-coding RNA CYTOR promotes the progression of melanoma via the miR-485-5p/GPI axis
Source: PeerJ journal article supplement (doi:10.7717/peerj.19284), 2025-04-22
Supplement: Original_Data.zip [file Fig. 5.C-Original data-GPI mRNA expression in cells.xlsx]

## Sheet: Sheet1
Cell		CT-value
replicate 1
PIGI	GAPDH	14.03
	GAPDH	14.07
	GAPDH	14.06
	GPI	25.75
	GPI	25.53
	GPI	25.87
SK-MEL-28	GAPDH	14.17
	GAPDH	14.05
	GAPDH	14.22
	GPI	23.93
	GPI	24.05
	GPI	24.01
MV3	GAPDH	14.62
	GAPDH	14.55
	GAPDH	14.95
	GPI	23.99
	GPI	23.98
	GPI	23.33
A875	GAPDH	14.35
	GAPDH	14.05
	GAPDH	14.02
	GPI	22.31
	GPI	22.35
	GPI	22.32
A375	GAPDH	13.9
	GAPDH	13.91
	GAPDH	13.95
	GPI	19.95
	GPI	19.93
	GPI	19.93
replicate 2
PIGI	GAPDH	14.32
	GAPDH	14.41
	GAPDH	14.63
	GPI	25.85
	GPI	25.78
	GPI	25.77
SK-MEL-28	GAPDH	14.44
	GAPDH	14.22
	GAPDH	14.04
	GPI	23.99
	GPI	23.98
	GPI	23.88
MV3	GAPDH	14.33
	GAPDH	14.17
	GAPDH	14.47
	GPI	23.53
	GPI	23.71
	GPI	23.33
A875	GAPDH	14.03
	GAPDH	13.98
	GAPDH	14.07
	GPI	22.09
	GPI	21.89
	GPI	22.18
A375	GAPDH	14
	GAPDH	13.97
	GAPDH	14.14
	GPI	19.85
	GPI	19.61
	GPI	19.93
replicate 3
PIGI	GAPDH	14.02
	GAPDH	13.81
	GAPDH	14.08
	GPI	25.87
	GPI	25.82
	GPI	25.8
SK-MEL-28	GAPDH	14.12
	GAPDH	14.15
	GAPDH	14.2
	GPI	23.46
	GPI	23.33
	GPI	23.55
MV3	GAPDH	14.14
	GAPDH	14.13
	GAPDH	14.1
	GPI	22.99
	GPI	22.95
	GPI	22.91
A875	GAPDH	14.01
	GAPDH	14.11
	GAPDH	14.03
	GPI	22.53
	GPI	22.63
	GPI	22.29
A375	GAPDH	14.41
	GAPDH	14.27
	GAPDH	14.36
	GPI	20.84
	GPI	20.73
	GPI	20.66
