# Supplementary material for: Long non-coding RNA CYTOR promotes the progression of melanoma via the miR-485-5p/GPI axis
Source: PeerJ journal article supplement (doi:10.7717/peerj.19284), 2025-04-22
Supplement: Original_Data.zip [file Fig. 5.E-Original data-GPI expression levels were measured using qRT-PCR in 18 pairs of melanoma tumors and adjacent non-tumorous tissues.xlsx]

## Sheet: Sheet1
Group		CT-Value
Normal-1	GAPDH	12.95
	GAPDH	12.95
	GAPDH	12.93
	GPI	22.01
	GPI	22.06
	GPI	21.93
Cancer-1	GAPDH	12.83
	GAPDH	12.8
	GAPDH	12.75
	GPI	20.94
	GPI	20.8
	GPI	21.01
Normal-2	GAPDH	13.13
	GAPDH	13.22
	GAPDH	12.91
	GPI	21.88
	GPI	22
	GPI	22.08
Cancer-2	GAPDH	12.79
	GAPDH	12.76
	GAPDH	12.76
	GPI	20.88
	GPI	20.83
	GPI	21.06
Normal-3	GAPDH	12.86
	GAPDH	12.82
	GAPDH	12.89
	GPI	21.81
	GPI	21.86
	GPI	22.03
Cancer-3	GAPDH	12.8
	GAPDH	12.81
	GAPDH	12.79
	GPI	20.86
	GPI	20.86
	GPI	20.98
Normal-4	GAPDH	13.87
	GAPDH	13.82
	GAPDH	13.85
	GPI	22.56
	GPI	22.53
	GPI	22.61
Cancer-4	GAPDH	13.82
	GAPDH	13.78
	GAPDH	13.8
	GPI	18.99
	GPI	18.99
	GPI	19.01
Normal-5	GAPDH	14.09
	GAPDH	14.05
	GAPDH	14.01
	GPI	22.01
	GPI	22.28
	GPI	22.44
Cancer-5	GAPDH	14.3
	GAPDH	14.18
	GAPDH	14.06
	GPI	19.53
	GPI	19.62
	GPI	19.44
Normal-6	GAPDH	14.46
	GAPDH	14.08
	GAPDH	14.81
	GPI	22.57
	GPI	22.7
	GPI	22.57
Cancer-6	GAPDH	13.82
	GAPDH	13.83
	GAPDH	13.92
	GPI	19.16
	GPI	19.14
	GPI	19.31
Normal-7	GAPDH	14.54
	GAPDH	14.46
	GAPDH	14.3
	GPI	22.47
	GPI	22.54
	GPI	22.72
Cancer-7	GAPDH	13.93
	GAPDH	13.93
	GAPDH	13.85
	GPI	19.09
	GPI	19.11
	GPI	19.07
Normal-8	GAPDH	13.92
	GAPDH	13.9
	GAPDH	13.94
	GPI	22.23
	GPI	22.18
	GPI	22.23
Cancer-8	GAPDH	13.83
	GAPDH	13.92
	GAPDH	13.92
	GPI	18.99
	GPI	18.95
	GPI	18.92
Normal-9	GAPDH	14.33
	GAPDH	14.53
	GAPDH	14.59
	GPI	22.8
	GPI	22.7
	GPI	22.79
Cancer-9	GAPDH	13.77
	GAPDH	14.12
	GAPDH	14.18
	GPI	19.16
	GPI	19.05
	GPI	19.24
Normal-10	GAPDH	13.97
	GAPDH	13.95
	GAPDH	13.98
	GPI	22.75
	GPI	22.54
	GPI	22.31
Cancer-10	GAPDH	13.85
	GAPDH	13.9
	GAPDH	13.9
	GPI	18.87
	GPI	18.88
	GPI	18.87
Normal-11	GAPDH	14.23
	GAPDH	14.23
	GAPDH	14.18
	GPI	22.75
	GPI	22.8
	GPI	22.49
Cancer-11	GAPDH	14.19
	GAPDH	14.28
	GAPDH	14.1
	GPI	21.05
	GPI	21.01
	GPI	20.95
Normal-12	GAPDH	14.2
	GAPDH	14.48
	GAPDH	14.11
	GPI	24.25
	GPI	24.3
	GPI	24.25
Cancer-12	GAPDH	14.01
	GAPDH	14.04
	GAPDH	13.98
	CYTOR	19.71
	CYTOR	19.91
	CYTOR	19.82
Normal-13	GAPDH	14.21
	GAPDH	13.96
	GAPDH	13.95
	GPI	22.57
	GPI	22.64
	GPI	22.78
Cancer-13	GAPDH	13.78
	GAPDH	13.7
	GAPDH	13.89
	GPI	19.45
	GPI	19.2
	GPI	19.31
Normal-14	GAPDH	14.06
	GAPDH	14.12
	GAPDH	13.99
	GPI	23.97
	GPI	23.98
	GPI	23.95
Cancer-14	GAPDH	14.04
	GAPDH	14.02
	GAPDH	14.07
	GPI	18.55
	GPI	18.59
	GPI	18.87
Normal-15	GAPDH	13.12
	GAPDH	12.89
	GAPDH	12.96
	GPI	21.92
	GPI	22.83
	GPI	21.98
Cancer-15	GAPDH	12.88
	GAPDH	12.76
	GAPDH	12.76
	GPI	20.78
	GPI	20.86
	GPI	20.76
Normal-16	GAPDH	14.11
	GAPDH	14.15
	GAPDH	14.1
	GPI	23.32
	GPI	23.55
	GPI	23.3
Cancer-16	GAPDH	14.13
	GAPDH	14.31
	GAPDH	14.18
	GPI	22.23
	GPI	21.99
	GPI	22.6
Normal-17	GAPDH	14.01
	GAPDH	14.16
	GAPDH	14.03
	GPI	23.97
	GPI	24.04
	GPI	24.02
Cancer-17	GAPDH	14.07
	GAPDH	13.98
	GAPDH	14.41
	GPI	19.79
	GPI	20.67
	GPI	19.81
Normal-18	GAPDH	14.12
	GAPDH	14.13
	GAPDH	14.6
	GPI	22.1
	GPI	22.28
	GPI	22.15
Cancer-18	GAPDH	14.02
	GAPDH	13.98
	GAPDH	14.21
	GPI	18.71
	GPI	18.48
	GPI	18.58
