# Supplementary material for: Long non-coding RNA CYTOR promotes the progression of melanoma via the miR-485-5p/GPI axis
Source: PeerJ journal article supplement (doi:10.7717/peerj.19284), 2025-04-22
Supplement: Original_Data.zip [file Fig. 5.F-Original data-GPI mRNA expression in MV3 and A875 cells following transfection with miR-485-5p mimics.xlsx]

## Sheet: MV3
Group		CT-value
replicate 1
miR-NC	GAPDH	12.78
	GAPDH	12.82
	GAPDH	12.82
	GPI	20.79
	GPI	20.87
	GPI	20.85
miR-485-5p mimics	GAPDH	12.96
	GAPDH	13.03
	GAPDH	12.93
	GPI	21.89
	GPI	22
	GPI	21.8
replicate 2
miR-NC	GAPDH	12.78
	GAPDH	12.75
	GAPDH	12.75
	GPI	20.85
	GPI	20.91
	GPI	20.87
miR-485-5p mimics	GAPDH	13.2
	GAPDH	13.22
	GAPDH	12.96
	GPI	21.91
	GPI	22.03
	GPI	22.07
replicate 3
miR-NC	GAPDH	12.79
	GAPDH	12.75
	GAPDH	12.75
	GPI	20.77
	GPI	21.07
	GPI	21.04
miR-485-5p mimics	GAPDH	12.8
	GAPDH	12.9
	GAPDH	12.95
	GPI	22.82
	GPI	21.99
	GPI	22.07

## Sheet: A875
Group		CT-value
replicate 1
miR-NC	GAPDH	12.78
	GAPDH	12.78
	GAPDH	12.81
	GPI	20.85
	GPI	20.77
	GPI	20.83
miR-485-5p mimics	GAPDH	12.84
	GAPDH	12.8
	GAPDH	12.96
	GPI	21.88
	GPI	21.91
	GPI	21.89
replicate 2
miR-NC	GAPDH	12.75
	GAPDH	12.75
	GAPDH	12.78
	GPI	20.87
	GPI	21.07
	GPI	20.87
miR-485-5p mimics	GAPDH	12.88
	GAPDH	13.22
	GAPDH	13.03
	GPI	22.05
	GPI	21.99
	GPI	22.03
replicate 3
miR-NC	GAPDH	12.74
	GAPDH	12.75
	GAPDH	12.82
	GPI	20.96
	GPI	20.87
	GPI	20.85
miR-485-5p mimics	GAPDH	12.85
	GAPDH	12.95
	GAPDH	12.96
	GPI	21.83
	GPI	22.07
	GPI	21.8
