# Supplementary material for: Long non-coding RNA CYTOR promotes the progression of melanoma via the miR-485-5p/GPI axis
Source: PeerJ journal article supplement (doi:10.7717/peerj.19284), 2025-04-22
Supplement: Original_Data.zip [file Fig. 5.G-Original data-GPI mRNA expression in MV3 and A875 cells following transfection with miR-485-5p inhibitor.xlsx]

## Sheet: MV3
Group		CT-value
replicate 1
miR-NC	GAPDH	12.86
	GAPDH	12.78
	GAPDH	12.8
	GPI	22.18
	GPI	22.27
	GPI	22.3
miR-485-5p inhibitor	GAPDH	12.77
	GAPDH	12.8
	GAPDH	12.79
	GPI	20.85
	GPI	21.06
	GPI	20.88
replicate 2
miR-NC	GAPDH	12.77
	GAPDH	12.79
	GAPDH	12.83
	GPI	22.53
	GPI	22.53
	GPI	22.56
miR-485-5p inhibitor	GAPDH	12.8
	GAPDH	13.04
	GAPDH	12.9
	GPI	20.73
	GPI	20.75
	GPI	20.72
replicate 3
miR-NC	GAPDH	12.74
	GAPDH	12.8
	GAPDH	12.8
	GPI	22.64
	GPI	22.56
	GPI	22.77
miR-485-5p inhibitor	GAPDH	12.83
	GAPDH	12.82
	GAPDH	12.8
	GPI	20.79
	GPI	20.85
	GPI	20.76

## Sheet: A875
Group		CT-value
replicate 1
miR-NC	GAPDH	12.86
	GAPDH	12.77
	GAPDH	12.83
	GPI	22.64
	GPI	22.18
	GPI	22.52
miR-485-5p inhibitor	GAPDH	12.8
	GAPDH	12.83
	GAPDH	12.81
	GPI	20.85
	GPI	20.73
	GPI	20.71
replicate 2
miR-NC	GAPDH	12.79
	GAPDH	12.8
	GAPDH	12.8
	GPI	22.27
	GPI	22.53
	GPI	22.28
miR-485-5p inhibitor	GAPDH	12.8
	GAPDH	12.95
	GAPDH	12.82
	GPI	20.75
	GPI	20.85
	GPI	20.79
replicate 3
miR-NC	GAPDH	12.8
	GAPDH	12.8
	GAPDH	12.81
	GPI	22.56
	GPI	22.77
	GPI	22.21
miR-485-5p inhibitor	GAPDH	12.79
	GAPDH	12.9
	GAPDH	12.8
	GPI	20.88
	GPI	20.76
	GPI	20.58
