# Supplementary material for: Long non-coding RNA CYTOR promotes the progression of melanoma via the miR-485-5p/GPI axis
Source: PeerJ journal article supplement (doi:10.7717/peerj.19284), 2025-04-22
Supplement: Original_Data.zip [file Fig. 6.A-Original data-Cell proliferation-MV3 and A875.xlsx]

## Sheet: MV3
0H
Group	OD-value
pcDNA NC	0.3311
pcDNA NC	0.3272
pcDNA NC	0.3394
pcDNA CYTOR	0.3305
pcDNA CYTOR	0.3193
pcDNA CYTOR	0.3286
miR-485-5p mimics	0.3197
miR-485-5p mimics	0.338
miR-485-5p mimics	0.3263
pcDNA CYTOR+miR-485-5p mimics	0.3289
pcDNA CYTOR+miR-485-5p mimics	0.3408
pcDNA CYTOR+miR-485-5p mimics	0.3101
24H
Group	OD-value
pcDNA NC	0.4961
pcDNA NC	0.5982
pcDNA NC	0.6089
pcDNA CYTOR	0.9109
pcDNA CYTOR	0.8123
pcDNA CYTOR	0.7331
miR-485-5p mimics	0.369
miR-485-5p mimics	0.3991
miR-485-5p mimics	0.43
pcDNA CYTOR+miR-485-5p mimics	0.5099
pcDNA CYTOR+miR-485-5p mimics	0.6691
pcDNA CYTOR+miR-485-5p mimics	0.619
48H
Group	OD-value
pcDNA NC	0.8931
pcDNA NC	1.0025
pcDNA NC	1.0854
pcDNA CYTOR	1.4823
pcDNA CYTOR	1.21
pcDNA CYTOR	1.3897
miR-485-5p mimics	0.4997
miR-485-5p mimics	0.5871
miR-485-5p mimics	0.702
pcDNA CYTOR+miR-485-5p mimics	0.9644
pcDNA CYTOR+miR-485-5p mimics	1.092
pcDNA CYTOR+miR-485-5p mimics	1.0135
72H
Group	OD-value
pcDNA NC	1.4085
pcDNA NC	1.3024
pcDNA NC	1.1708
pcDNA CYTOR	1.5892
pcDNA CYTOR	1.6995
pcDNA CYTOR	1.8502
miR-485-5p mimics	0.7981
miR-485-5p mimics	0.8501
miR-485-5p mimics	0.939
pcDNA CYTOR+miR-485-5p mimics	1.2889
pcDNA CYTOR+miR-485-5p mimics	1.4086
pcDNA CYTOR+miR-485-5p mimics	1.3969
96H
Group	OD-value
pcDNA NC	1.8779
pcDNA NC	1.6658
pcDNA NC	1.79
pcDNA CYTOR	2.3936
pcDNA CYTOR	2.3909
pcDNA CYTOR	2.078
miR-485-5p mimics	1.2033
miR-485-5p mimics	1.4907
miR-485-5p mimics	1.234
pcDNA CYTOR+miR-485-5p mimics	1.789
pcDNA CYTOR+miR-485-5p mimics	1.8719
pcDNA CYTOR+miR-485-5p mimics	1.8886

## Sheet: A875
0H
Group	OD-value
pcDNA NC	0.3387
pcDNA NC	0.3309
pcDNA NC	0.328
pcDNA CYTOR	0.3401
pcDNA CYTOR	0.3352
pcDNA CYTOR	0.3103
miR-485-5p mimics	0.3327
miR-485-5p mimics	0.32
miR-485-5p mimics	0.3179
pcDNA CYTOR+miR-485-5p mimics	0.338
pcDNA CYTOR+miR-485-5p mimics	0.3225
pcDNA CYTOR+miR-485-5p mimics	0.3156
24H
Group	OD-value
pcDNA NC	0.5881
pcDNA NC	0.5031
pcDNA NC	0.4981
pcDNA CYTOR	0.8901
pcDNA CYTOR	0.8099
pcDNA CYTOR	0.7233
miR-485-5p mimics	0.4021
miR-485-5p mimics	0.3792
miR-485-5p mimics	0.4198
pcDNA CYTOR+miR-485-5p mimics	0.5889
pcDNA CYTOR+miR-485-5p mimics	0.6291
pcDNA CYTOR+miR-485-5p mimics	0.5605
48H
Group	OD-value
pcDNA NC	0.889
pcDNA NC	1.0821
pcDNA NC	1.0986
pcDNA CYTOR	1.5097
pcDNA CYTOR	1.2096
pcDNA CYTOR	1.389
miR-485-5p mimics	0.4892
miR-485-5p mimics	0.6032
miR-485-5p mimics	0.6994
pcDNA CYTOR+miR-485-5p mimics	0.9875
pcDNA CYTOR+miR-485-5p mimics	1.0993
pcDNA CYTOR+miR-485-5p mimics	1.121
72H
Group	OD-value
pcDNA NC	1.3908
pcDNA NC	1.321
pcDNA NC	1.2682
pcDNA CYTOR	1.8492
pcDNA CYTOR	1.7102
pcDNA CYTOR	1.699
miR-485-5p mimics	0.8612
miR-485-5p mimics	0.7893
miR-485-5p mimics	0.982
pcDNA CYTOR+miR-485-5p mimics	1.5021
pcDNA CYTOR+miR-485-5p mimics	1.3673
pcDNA CYTOR+miR-485-5p mimics	1.2992
96H
Group	OD-value
pcDNA NC	1.8091
pcDNA NC	1.6529
pcDNA NC	1.8709
pcDNA CYTOR	2.3897
pcDNA CYTOR	2.1896
pcDNA CYTOR	2.2347
miR-485-5p mimics	1.1989
miR-485-5p mimics	1.2678
miR-485-5p mimics	1.4897
pcDNA CYTOR+miR-485-5p mimics	1.7983
pcDNA CYTOR+miR-485-5p mimics	1.9002
pcDNA CYTOR+miR-485-5p mimics	1.8902
