# Supplementary material for: Long non-coding RNA CYTOR promotes the progression of melanoma via the miR-485-5p/GPI axis
Source: PeerJ journal article supplement (doi:10.7717/peerj.19284), 2025-04-22
Supplement: Original_Data.zip [file Fig. 7.A-Original data-tumor volume.xlsx]

## Sheet: Sheet1
Days	Group	Tumor length	Tumor width
6	sh-NC-1	6.1	5.99
	sh-NC-2	6.13	5.78
	sh-NC-3	5.64	5.12
	sh-NC-4	6.97	6.79
	sh-NC-5	7	6.66
	sh-CYTOR-1	6.56	5.79
	sh-CYTOR-2	5.7	5.21
	sh-CYTOR-3	6.58	5.75
	sh-CYTOR-4	5.43	5.29
	sh-CYTOR-5	6.71	5.91
9	sh-NC-1	7.21	7.13
	sh-NC-2	7.34	7.15
	sh-NC-3	6.95	6.86
	sh-NC-4	7.44	7.17
	sh-NC-5	6.99	6.58
	sh-CYTOR-1	6.67	6.59
	sh-CYTOR-2	5.78	5.34
	sh-CYTOR-3	6.79	6.1
	sh-CYTOR-4	5.44	5.37
	sh-CYTOR-5	6.82	5.93
12	sh-NC-1	10.79	8.14
	sh-NC-2	8.58	7.01
	sh-NC-3	9.49	8
	sh-NC-4	9.18	8.15
	sh-NC-5	9.05	7.17
	sh-CYTOR-1	7.01	6.89
	sh-CYTOR-2	5.8	5.8
	sh-CYTOR-3	7.1	6.91
	sh-CYTOR-4	5.79	5.33
	sh-CYTOR-5	6.99	6.82
15	sh-NC-1	11.8	8.89
	sh-NC-2	9.12	7.98
	sh-NC-3	10.11	8.94
	sh-NC-4	9.81	9.63
	sh-NC-5	9.94	9.02
	sh-CYTOR-1	7.82	7.75
	sh-CYTOR-2	5.99	5.69
	sh-CYTOR-3	7.88	7.37
	sh-CYTOR-4	7.51	5.39
	sh-CYTOR-5	7.79	7.1
18	sh-NC-1	12.91	10.91
	sh-NC-2	10.55	9.55
	sh-NC-3	12.17	10.68
	sh-NC-4	12.02	10.59
	sh-NC-5	11.89	9.98
	sh-CYTOR-1	8.89	8.51
	sh-CYTOR-2	7.31	6.58
	sh-CYTOR-3	8.38	7.89
	sh-CYTOR-4	8.3	7.29
	sh-CYTOR-5	8.43	8.27
