# Supplementary material for: Long non-coding RNA CYTOR promotes the progression of melanoma via the miR-485-5p/GPI axis
Source: PeerJ journal article supplement (doi:10.7717/peerj.19284), 2025-04-22
Supplement: Original_Data.zip [file Fig. 7.C-Original data-tumor weight.xlsx]

## Sheet: Sheet1
Group	Weight
sh-NC-1	753.172
sh-NC-2	471.329
sh-NC-3	680.361
sh-NC-4	660.399
sh-NC-5	582.483
sh-CYTOR-1	311.187
sh-CYTOR-2	157.202
sh-CYTOR-3	253.862
sh-CYTOR-4	218.171
sh-CYTOR-5	283.545
