# Supplementary material for: Long non-coding RNA CYTOR promotes the progression of melanoma via the miR-485-5p/GPI axis
Source: PeerJ journal article supplement (doi:10.7717/peerj.19284), 2025-04-22
Supplement: Original_Data.zip [file Fig. 7.D-Original data-miR-485-5p expression in vivo.xlsx]

## Sheet: Sheet1
Group		CT-value
sh-NC-1	GAPDH	15.14
	GAPDH	15.13
	CYTOR	29.57
	CYTOR	29.82
sh-CYTOR-1	GAPDH	15.11
	GAPDH	15.1
	CYTOR	28.79
	CYTOR	28.76
sh-NC-2	GAPDH	15.15
	GAPDH	15.15
	CYTOR	29.71
	CYTOR	30.06
sh-CYTOR-2	GAPDH	15.1
	GAPDH	15.1
	CYTOR	28.77
	CYTOR	28.71
sh-NC-3	GAPDH	15.14
	GAPDH	15.2
	CYTOR	29.72
	CYTOR	29.74
sh-CYTOR-3	GAPDH	15.08
	GAPDH	15.13
	CYTOR	28.73
	CYTOR	28.71
sh-NC-4	GAPDH	15.19
	GAPDH	15.25
	CYTOR	29.74
	CYTOR	29.94
sh-CYTOR-4	GAPDH	15.02
	GAPDH	15.11
	CYTOR	28.8
	CYTOR	28.84
sh-NC-5	GAPDH	15.1
	GAPDH	15.02
	CYTOR	29.82
	CYTOR	29.72
sh-CYTOR-5	GAPDH	15.1
	GAPDH	15.08
	CYTOR	28.71
	CYTOR	28.8
