# Supplementary figures and images for: Long non-coding RNA CYTOR promotes the progression of melanoma via the miR-485-5p/GPI axis
Source: PeerJ journal article supplement (doi:10.7717/peerj.19284), 2025-04-22

Figure 5.C Example of original western blot

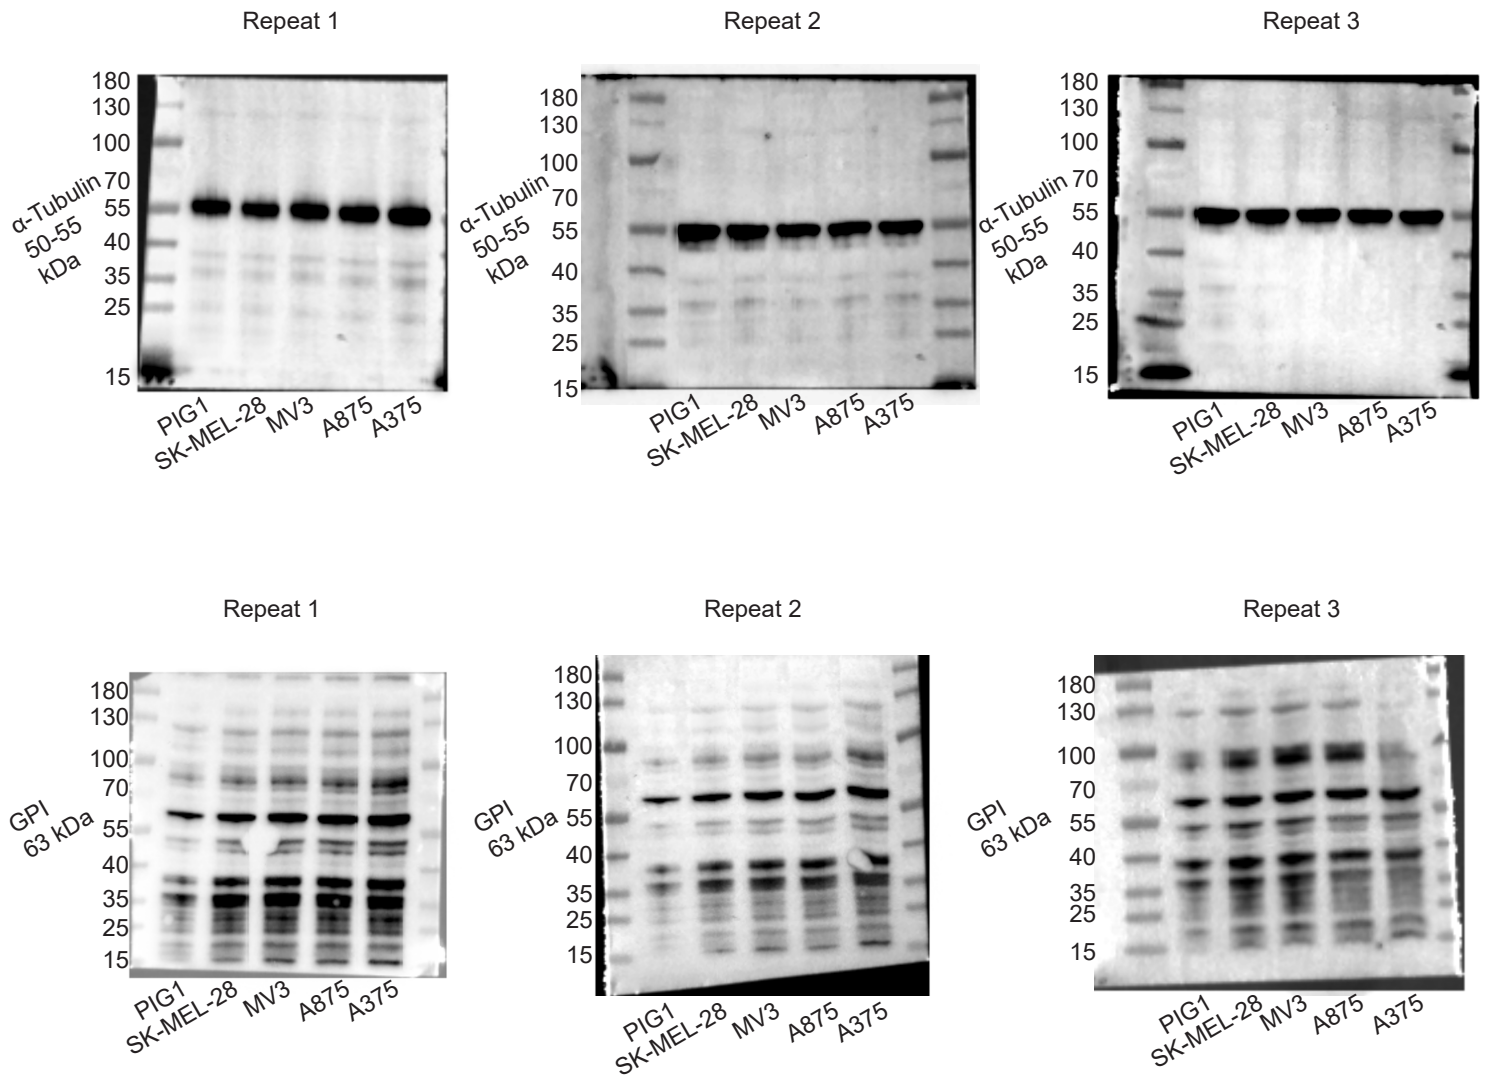

Supplement: supplementary_files.zip [file Figure 5.C Example of original western blot.pdf › supplementary files/Figure 5.C Example of original western blot.pdf]

Figure 5.F Example of original western blot-A875

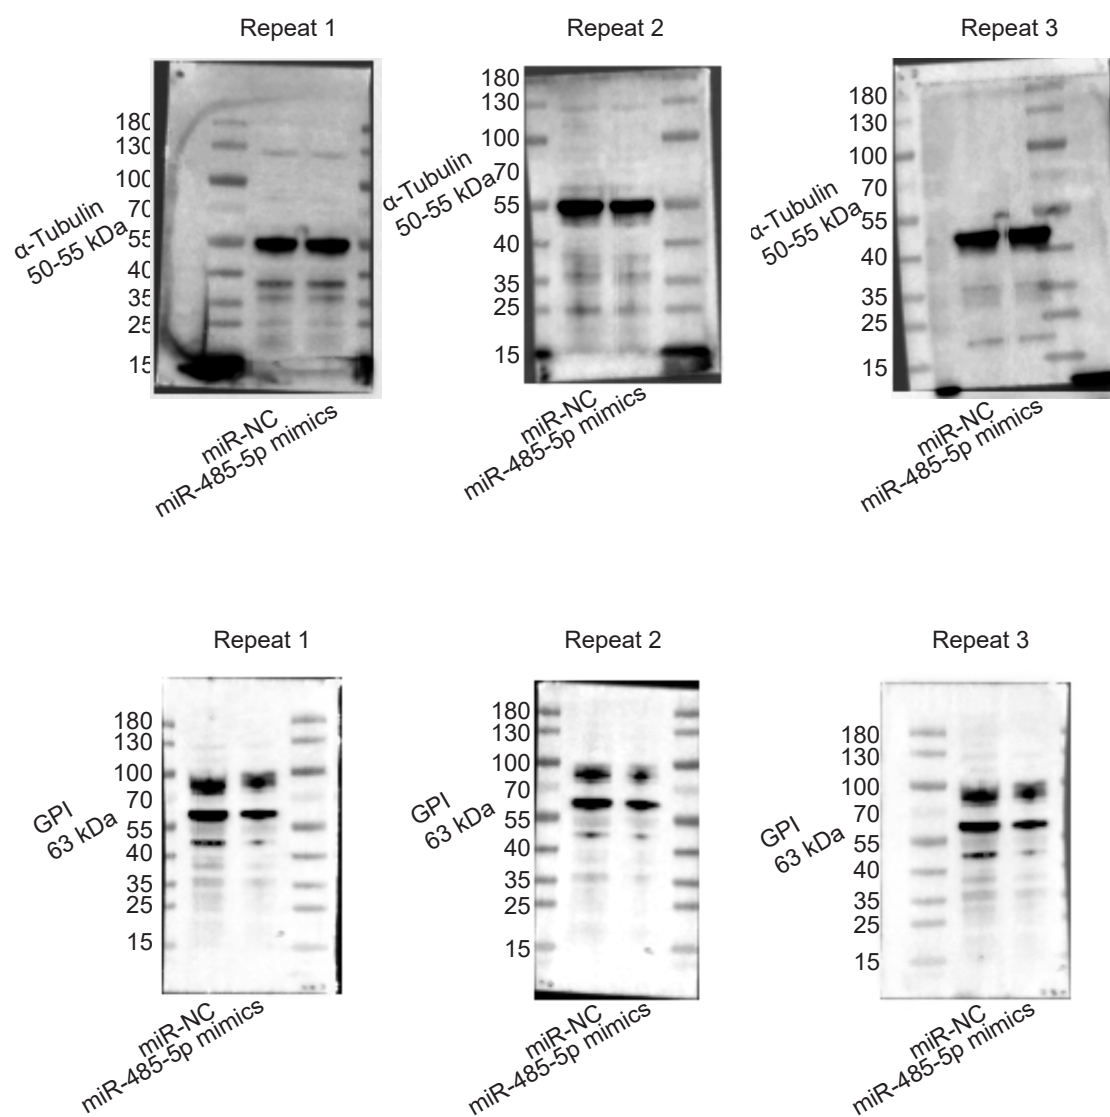

Supplement: supplementary_files.zip [file Figure 5.F Example of original western blot-A875.pdf › supplementary files/Figure 5.F Example of original western blot-A875.pdf]

Figure 5.F Example of original western blot-MV3

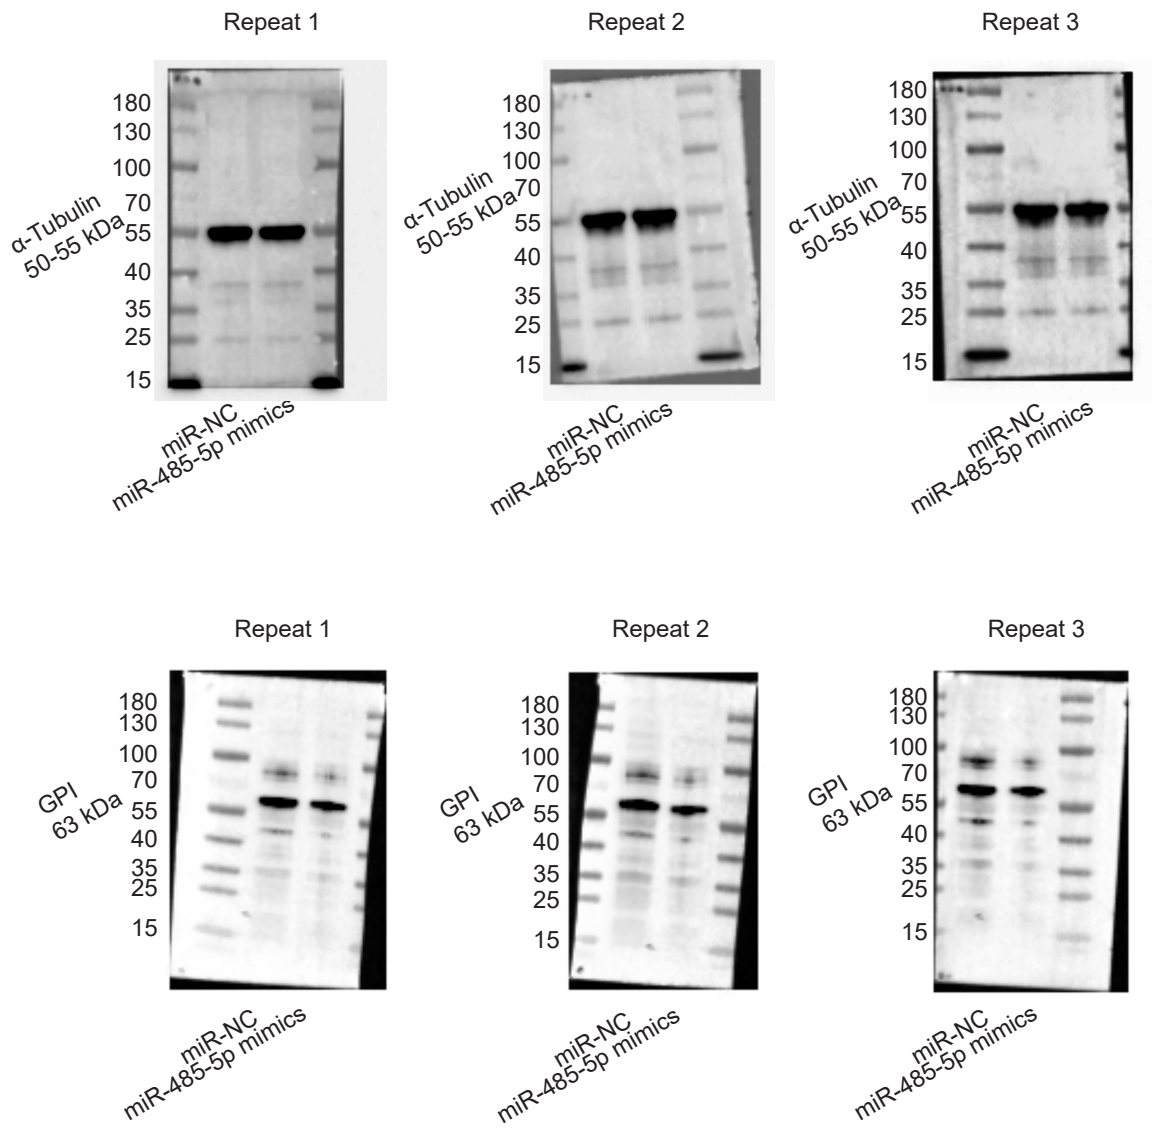

Supplement: supplementary_files.zip [file Figure 5.F Example of original western blot-MV3.pdf › supplementary files/Figure 5.F Example of original western blot-MV3.pdf]

Figure 5.G Example of original western blot-A875

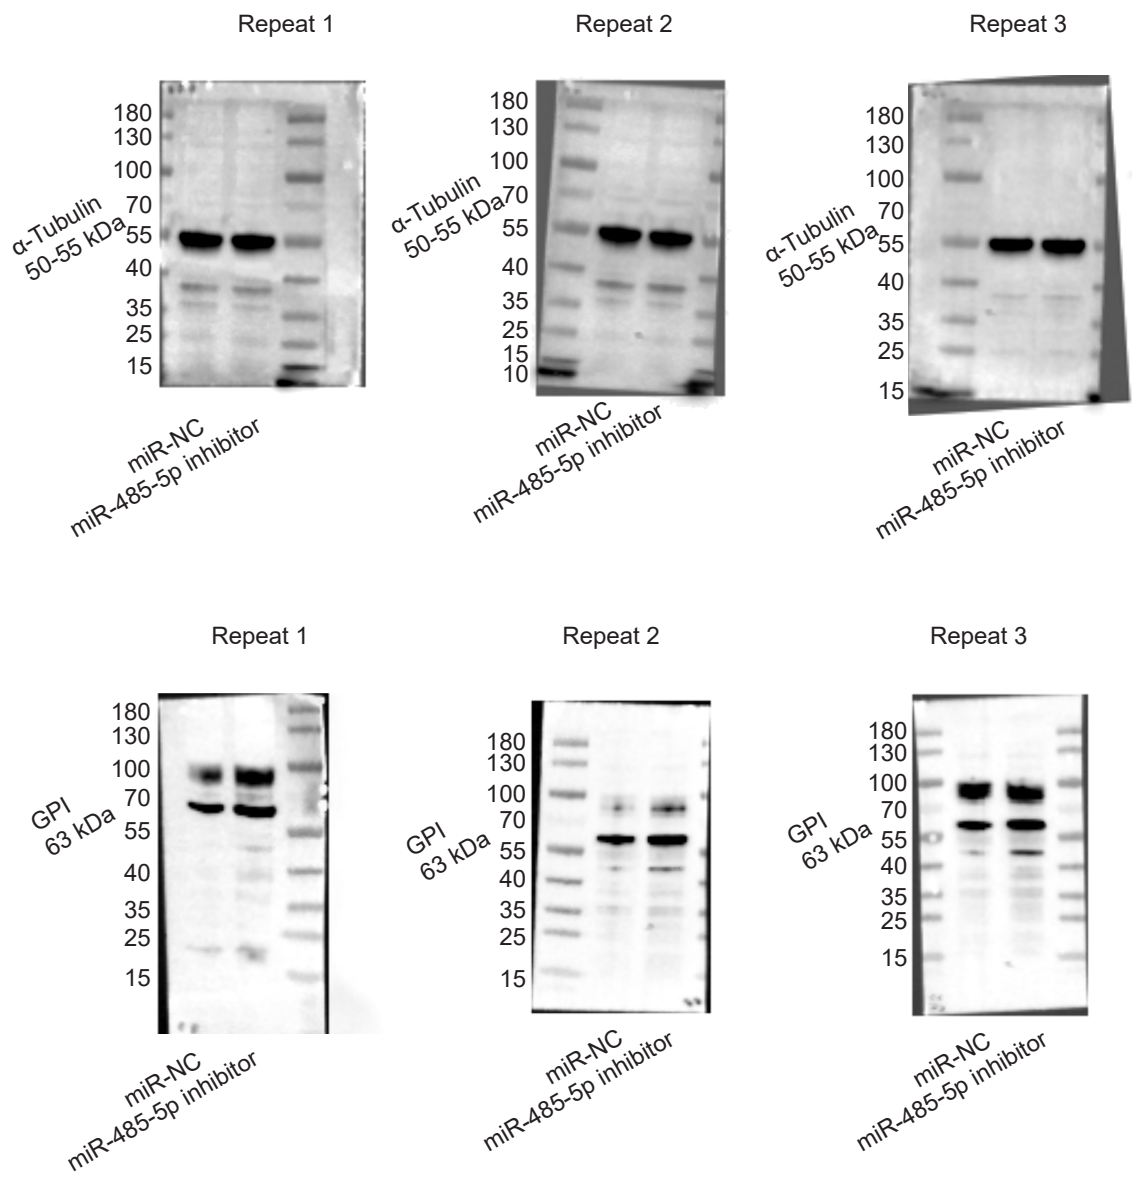

Supplement: supplementary_files.zip [file Figure 5.G Example of original western blot-A875.pdf › supplementary files/Figure 5.G Example of original western blot-A875.pdf]

Figure 5.G Example of original western blot-MV3

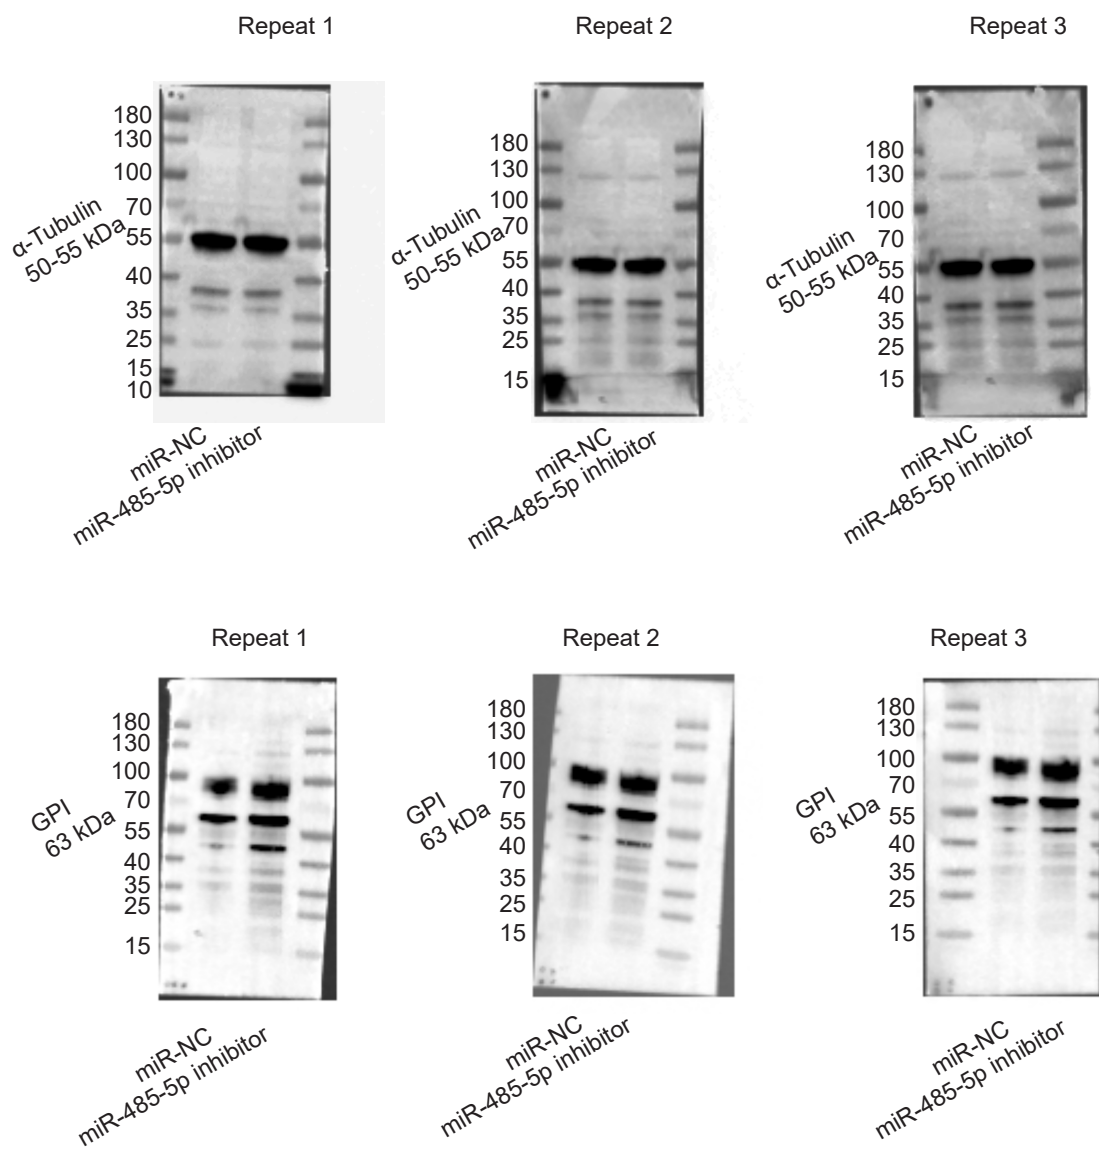

Supplement: supplementary_files.zip [file Figure 5.G Example of original western blot-MV3.pdf › supplementary files/Figure 5.G Example of original western blot-MV3.pdf]

Figure 6.D Example of original western blot-A875

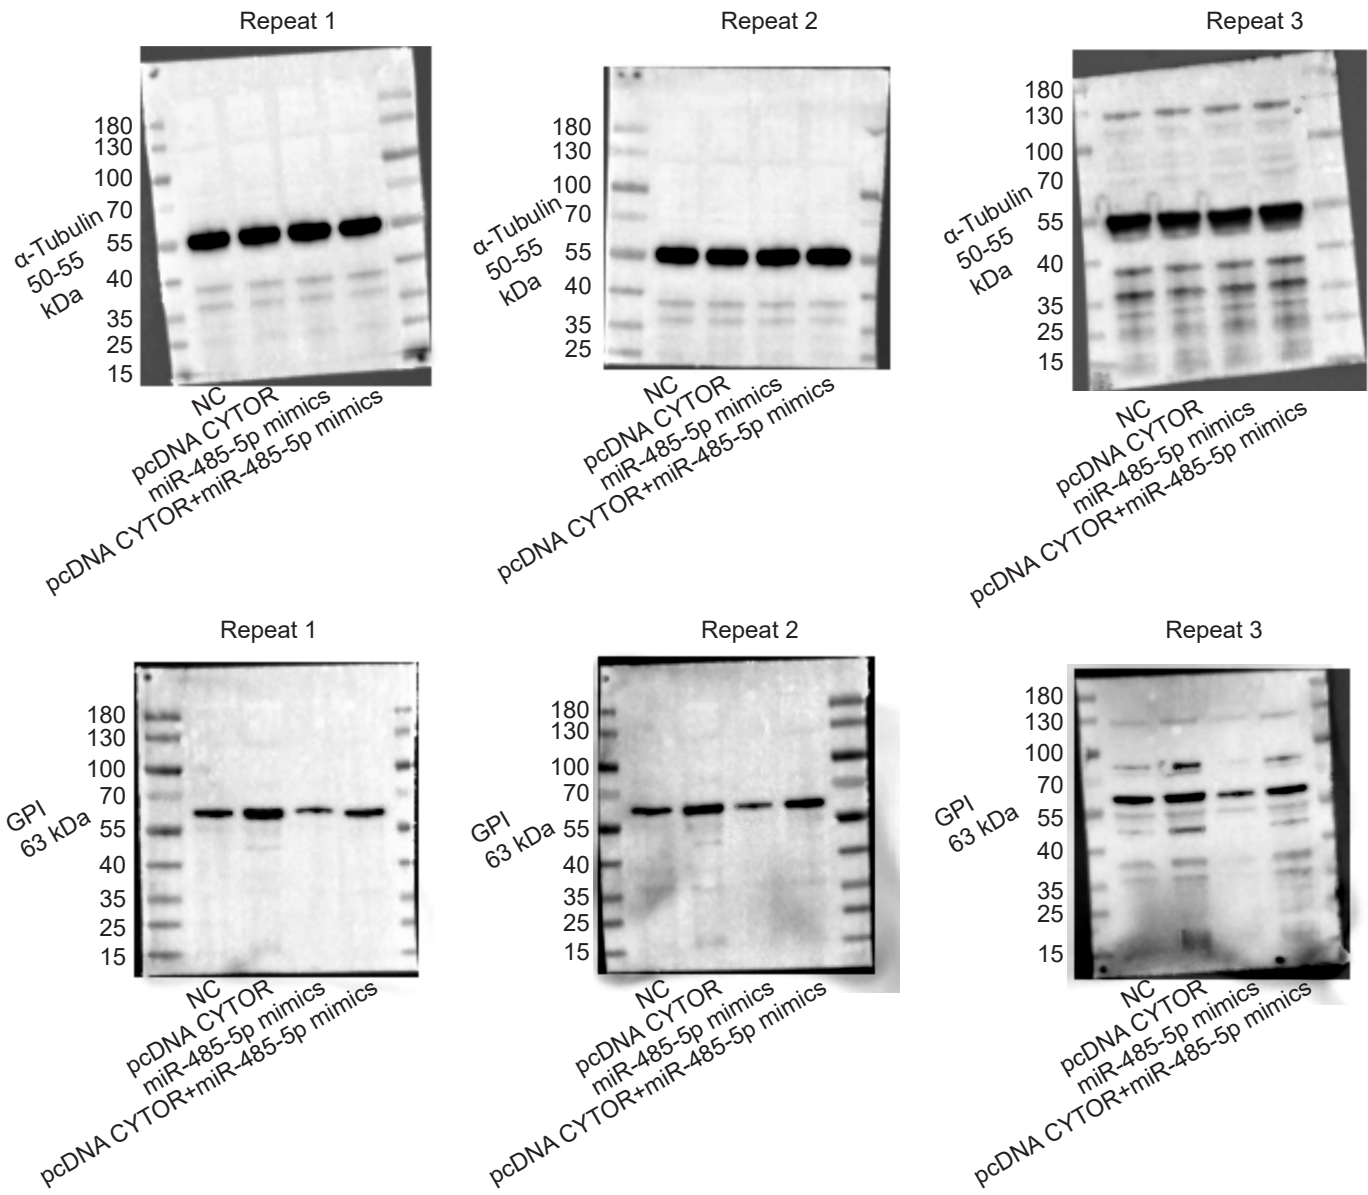

Supplement: supplementary_files.zip [file Figure 6.D Example of original western blot-A875.pdf › supplementary files/Figure 6.D Example of original western blot-A875.pdf]

Figure 6.D Example of original western blot-MV3

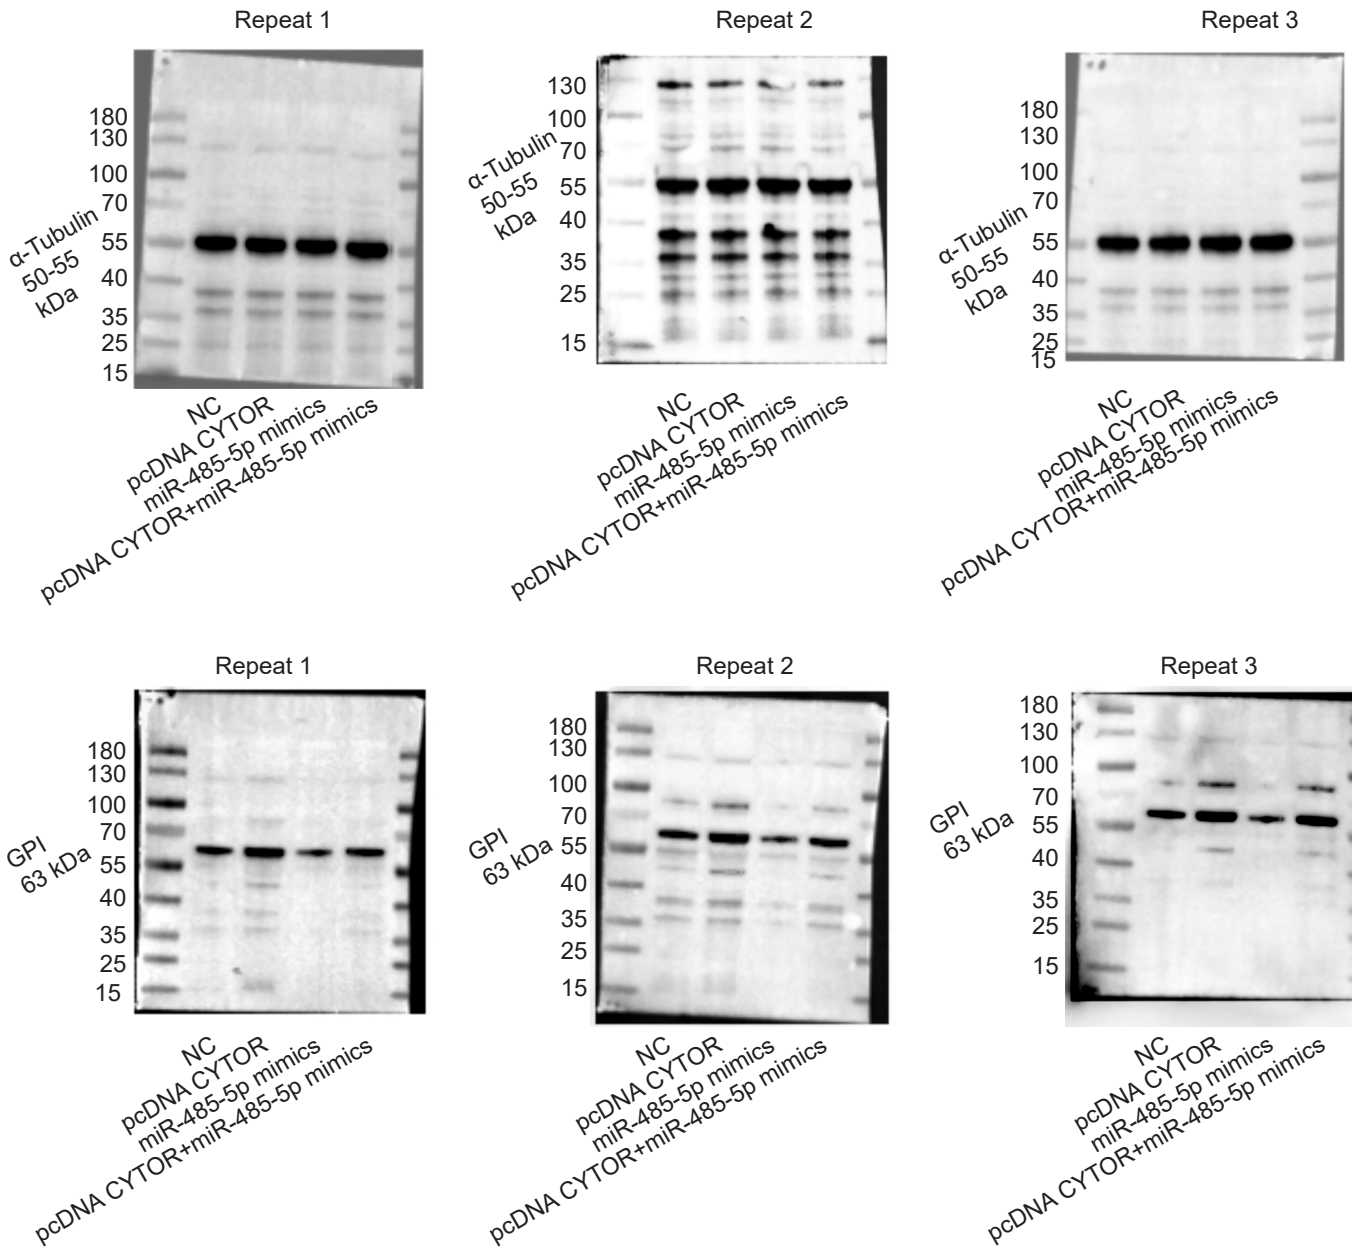

Supplement: supplementary_files.zip [file Figure 6.D Example of original western blot-MV3.pdf › supplementary files/Figure 6.D Example of original western blot-MV3.pdf]

Figure 7.E Example of original western blot

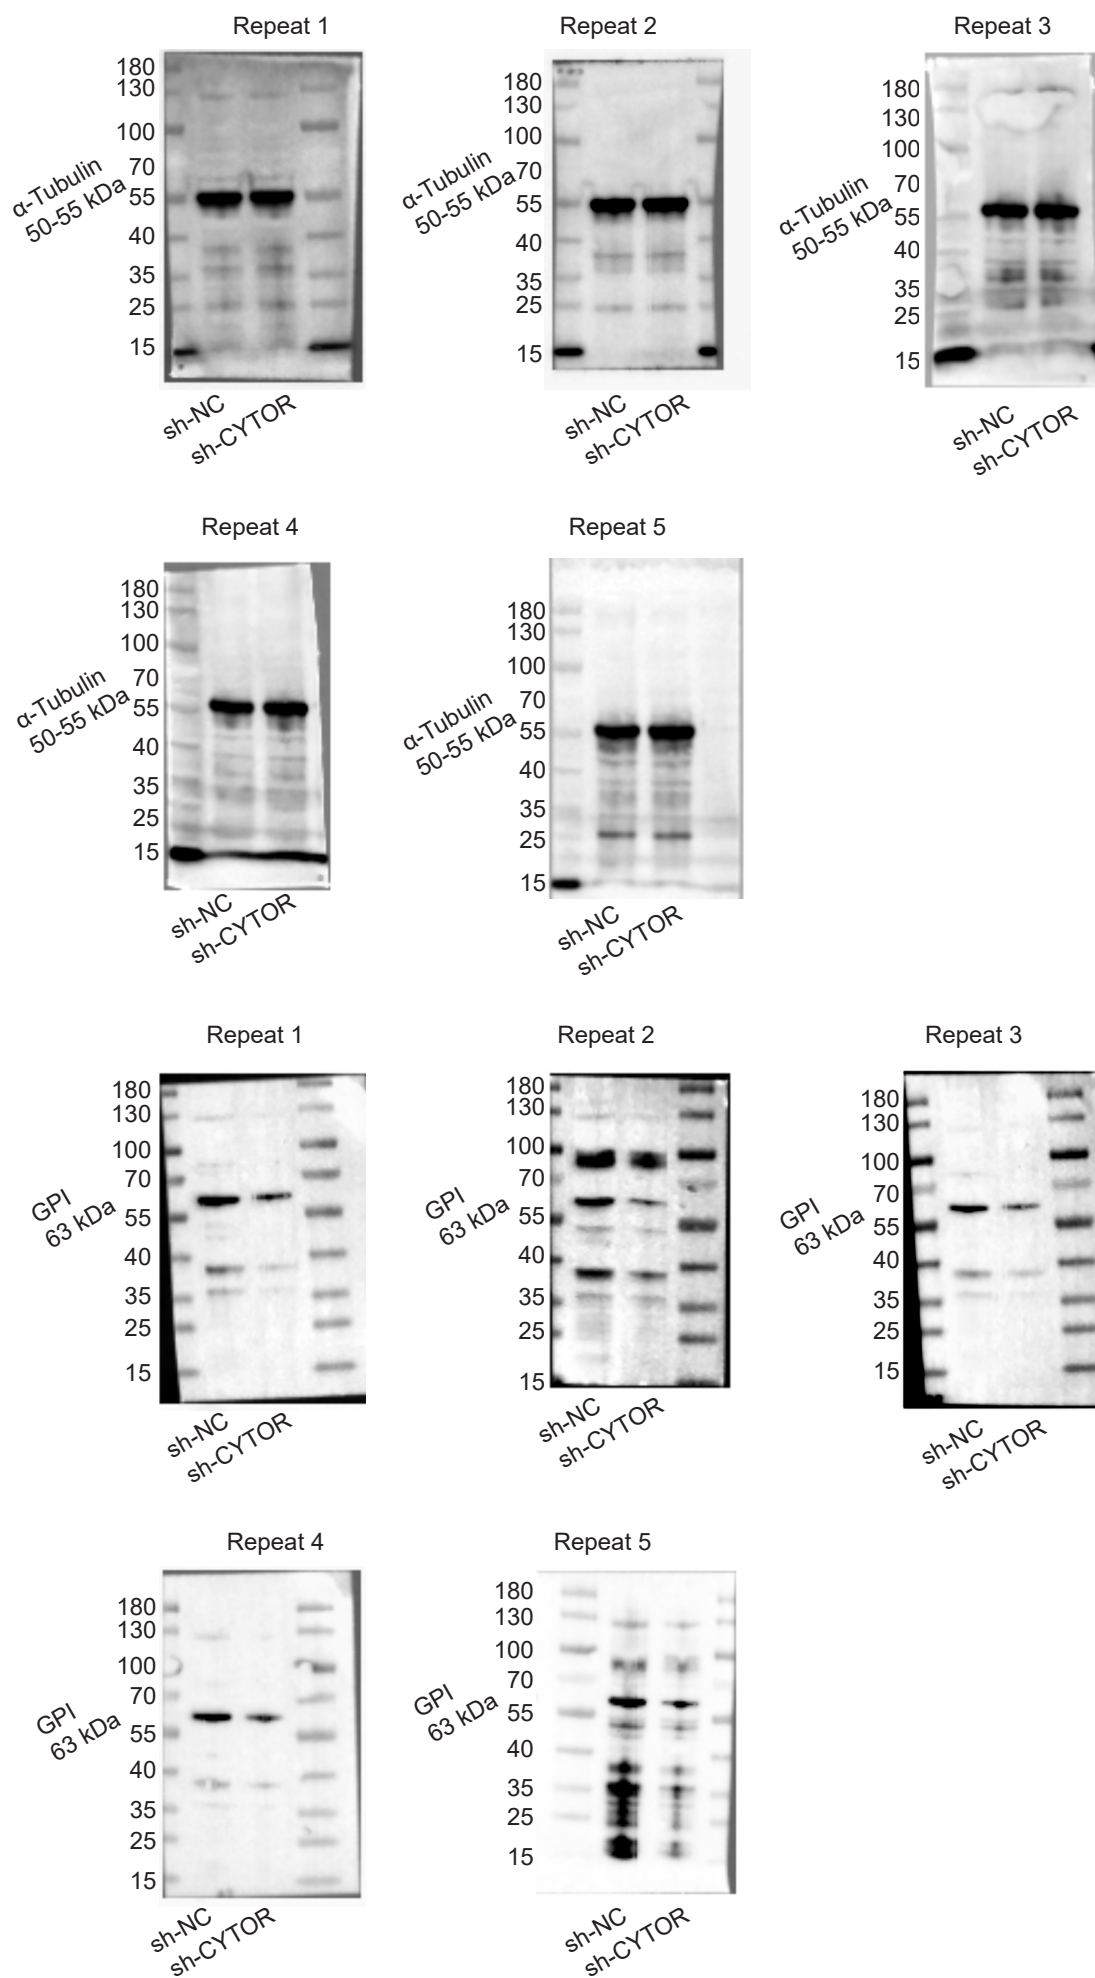

Supplement: supplementary_files.zip [file Figure 7.E Example of original western blot.pdf › supplementary files/Figure 7.E Example of original western blot.pdf]
